# Supplementary material for: An insight into the Lewis acid-catalyzed intramolecular aminocyanation and oxycyanation of alkenes: a concerted or stepwise mechanism
Source: Royal Society of Chemistry journal article supplement (doi:10.1039/c5cc06808h), 2015-01-01
Supplement: c5cc06808h1.pdf [file c5cc06808h1.pdf]

## Supporting Information

### **Insight into the Lewis acid-catalyzed Intramolecular Aminocyanation and Oxycyanation of Alkenes: Concerted or Stepwise Mechanism**

*Jiyang Zhao<sup>a,b</sup>, Guoqiang Wang<sup>a</sup>, and Shuhua Li<sup>a\*</sup>*

<sup>a</sup>School of Chemistry and Chemical Engineering, Key Laboratory of Mesoscopic Chemistry of Ministry of Education, Institute of Theoretical and Computational Chemistry, Nanjing University, Nanjing 210093, People's Republic of China.

<sup>b</sup>Office of Science and Technology, Nanjing Xiaozhuang University, Nanjing 211171, People's Republic of China.

shuhua@nju.edu.cn

**The supporting information includes:**

|                                                                                                                                                                                                                                                                                   |     |
|-----------------------------------------------------------------------------------------------------------------------------------------------------------------------------------------------------------------------------------------------------------------------------------|-----|
| Complete representation of Ref.7.....                                                                                                                                                                                                                                             | S3  |
| Computational details.....                                                                                                                                                                                                                                                        | S4  |
| <b>Figure S1.</b> Optimized structure of the transition state <b>TS</b> <sub>1/2</sub> in the intramolecular addition of the reactant <b>1</b> in toluene.....                                                                                                                    | S5  |
| <b>Figure S2.</b> Optimized structures of intermediates, transition states and products in the pathway A of the intramolecular addition of the reactant <b>1</b> in toluene.....                                                                                                  | S6  |
| <b>Figure S3.</b> Gibbs free energy profiles of the pathway A of the intramolecular addition of the reactant <b>1</b> with B(C <sub>6</sub> F <sub>5</sub> ) <sub>3</sub> as the catalyst in toluene.....                                                                         | S6  |
| <b>Figure S4.</b> Gibbs free energy barriers of the intramolecular alkene addition reactions catalyzed by the Lewis acid B(C <sub>6</sub> F <sub>5</sub> ) <sub>3</sub> . Different reactants with various substituents at the N3 atom are used in different reactions.....       | S7  |
| <b>Figure S5.</b> Gibbs free energy barriers of the intramolecular alkene addition reactions catalyzed by the Lewis acid B(C <sub>6</sub> F <sub>5</sub> ) <sub>3</sub> . Different reactants with various substituents on the alkene moiety are used in different reactions..... | S7  |
| <b>Figure S6.</b> Optimized structures of intermediates, transition states and products in the intramolecular addition of the reactant <b>a</b> in toluene.....                                                                                                                   | S8  |
| <b>Figure S7.</b> Gibbs free energy profiles of the intramolecular addition of the reactant <b>a</b> catalyzed by B(C <sub>6</sub> F <sub>5</sub> ) <sub>3</sub> in toluene.....                                                                                                  | S8  |
| <b>Figure S8.</b> Optimized structures of intermediates, transition states and products in the intramolecular oxycyanation of the substrate <b>b</b> catalyzed by B(C <sub>6</sub> F <sub>5</sub> ) <sub>3</sub> in tetrahydrofuran.....                                          | S9  |
| <b>Figure S9.</b> Gibbs free energy profiles of intramolecular oxycyanation of the substrate <b>b</b> catalyzed by B(C <sub>6</sub> F <sub>5</sub> ) <sub>3</sub> in tetrahydrofuran.....                                                                                         | S10 |
| <b>Table S1.</b> Cartesian coordinates and energies of all species.....                                                                                                                                                                                                           | S11 |

Complete representation of Ref.7:

Gaussian 09, Revision B.01, M. J. Frisch, G. W. Trucks, H. B. Schlegel, G. E. Scuseria, M. A. Robb, J. R. Cheeseman, G. Scalmani, V. Barone, B. Mennucci, G. A. Petersson, H. Nakatsuji, M. Caricato, X. Li, H. P. Hratchian, A. F. Izmaylov, J. Bloino, G. Zheng, J. L. Sonnenberg, M. Hada, M. Ehara, K. Toyota, R. Fukuda, J. Hasegawa, M. Ishida, T. Nakajima, Y. Honda, O. Kitao, H. Nakai, T. Vreven, J. A. Montgomery, Jr., J. E. Peralta, F. Ogliaro, M. Bearpark, J. J. Heyd, E. Brothers, K. N. Kudin, V. N. Staroverov, T. Keith, R. Kobayashi, J. Normand, K. Raghavachari, A. Rendell, J. C. Burant, S. S. Iyengar, J. Tomasi, M. Cossi, N. Rega, J. M. Millam, M. Klene, J. E. Knox, J. B. Cross, V. Bakken, C. Adamo, J. Jaramillo, R. Gomperts, R. E. Stratmann, O. Yazyev, A. J. Austin, R. Cammi, C. Pomelli, J. W. Ochterski, R. L. Martin, K. Morokuma, V. G. Zakrzewski, G. A. Voth, P. Salvador, J. J. Dannenberg, S. Dapprich, A. D. Daniels, O. Farkas, J. B. Foresman, J. V. Ortiz, J. Cioslowski, and D. J. Fox, Gaussian, Inc., Wallingford CT, 2010.

## COMPUTATIONAL DETAILS

All calculations are performed with the Gaussian09 program. The popular M06-2x functional is used in all DFT calculations. The LANL2DZ basis set<sup>S1</sup> is employed for the tin atom and the 6-311G(d,p) basis set<sup>S2</sup> is used for all other atoms in the reactants and catalysts. Geometry optimizations are conducted without any constraint in the gas phase and in toluene or tetrahydrofuran solutions (using the self-consistent reaction field (SCRF) method<sup>S3</sup> with the IEFPCM solvation model). We have performed vibrational frequency calculations to verify whether the optimized stationary points are minima or saddle points and to get relevant thermodynamic energy corrections. Further, intrinsic reaction coordinate (IRC)<sup>S4</sup> analysis has been carried out to confirm the connectivity between the transition state and its neighboring minima. Natural population analyses (NPA)<sup>S5</sup> are performed also at the same level of theory.

[S1] C. E. Check, T. O. Faust, J. M. Bailey, B. J. Wright, T. M. Gilbert and L. S. Sunderlin, *J. Phys. Chem. A.*, 2001, **105**, 8111-8116.

[S2] R. Krishnan, J. S. Binkley, R. Seeger and J. A. Pople. *J. Chem. Phys.*, 1980, **72**, 650-654.

[S3] M. Cossi, N. Rega, G. Scalmani and V. Barone, *J. Comput. Chem.*, 2003, **24**, 669-681.

[S4] (a) K. Fukui, *Acc. Chem. Res.*, 1981, **14**, 363-68; (b) H. P. Hratchian and H. B. Schlegel, *Theory and Applications of Computational Chemistry: The First 40 Years*, Elsevier, Amsterdam, 2005, PP. 195-249.

[S5] (a) A. E. Reed and F. Weinhold, *J. Chem. Phys.*, 1983, **78**, 4066-4073; (b) J. P. Foster and F. Weinhold, *J. Am. Chem. Soc.*, 1980, **102**, 7211-7218.

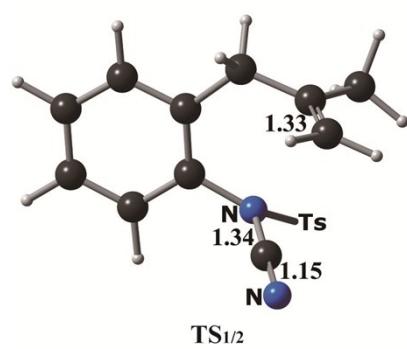

**Figure S1.** Optimized structure of the transition state  $\text{TS}_{1/2}$  in the intramolecular addition of the reactant **1** in toluene. All bond lengths are in Å.

The reaction pathway A of the intramolecular aminocyanation reaction of the reactant **1** catalyzed by the Lewis acid  $B(C_6F_5)_3$ .

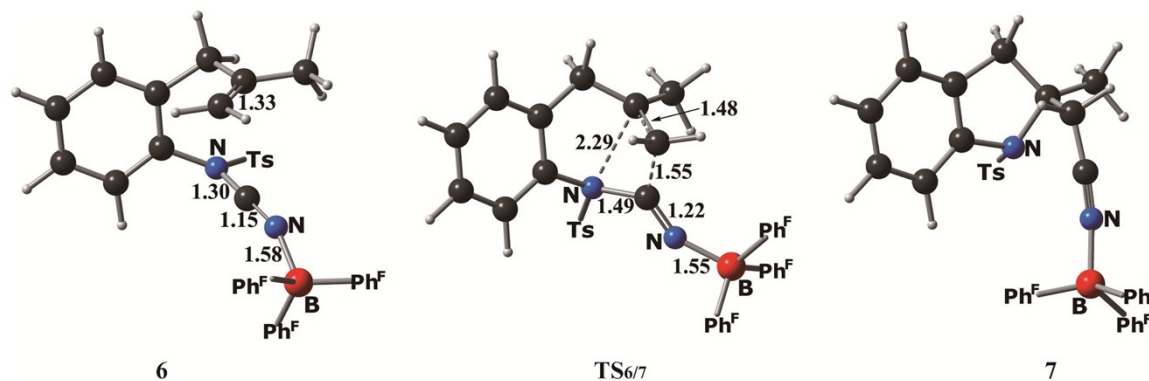

**Figure S2.** Optimized structures of intermediates, transition states and products in the pathway A of the intramolecular addition of the reactant **1** in toluene. All bond lengths are in Å.

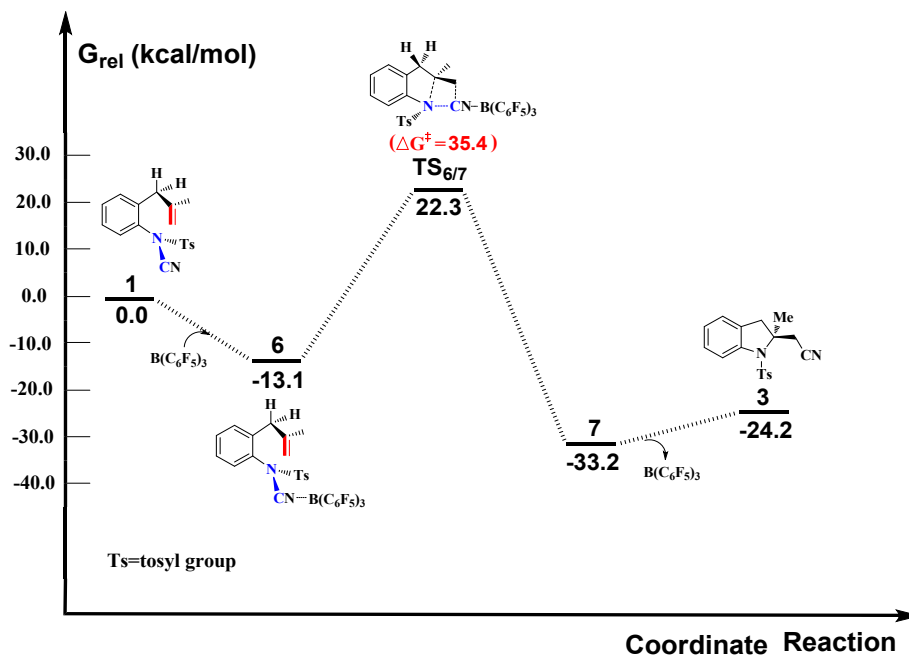

**Figure S3.** Gibbs free energy profiles of the pathway A of the intramolecular addition of the reactant **1** with  $B(C_6F_5)_3$  as the catalyst in toluene. Relative free energies calculated at 298.15 K and 1 atm (with respect to that of the reactants) are given.

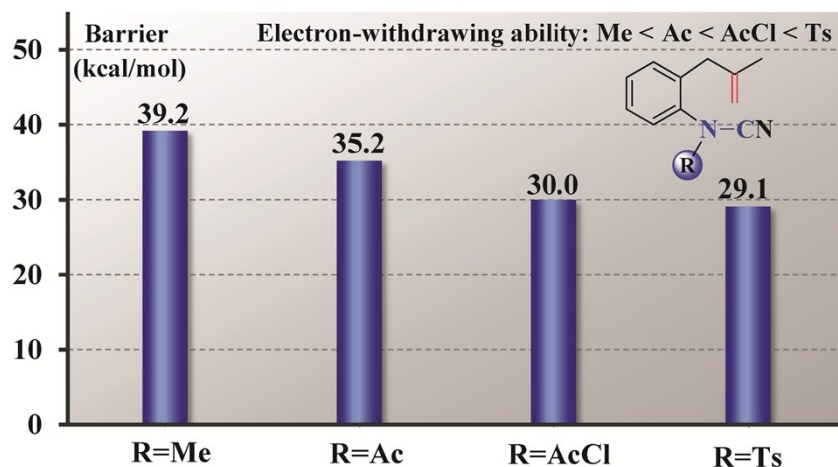

**Figure S4.** Gibbs free energy barriers of the intramolecular alkene addition reactions catalyzed by the Lewis acid  $B(C_6F_5)_3$ . Different reactants with various substituents at the N3 atom are used in different reactions.

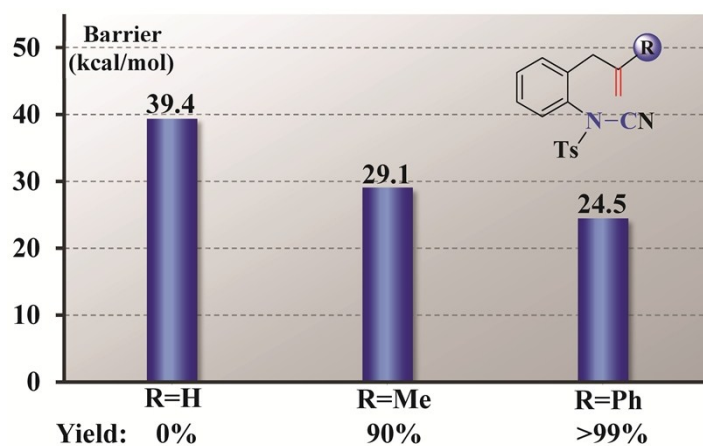

**Figure S5.** Gibbs free energy barriers of the intramolecular alkene addition reactions catalyzed by the Lewis acid  $B(C_6F_5)_3$ . Different reactants with various substituents on the alkene moiety are used in different reactions.

The intramolecular aminocyanation reaction of the reactant *a* catalyzed by the Lewis acid

$B(C_6F_5)_3$ .

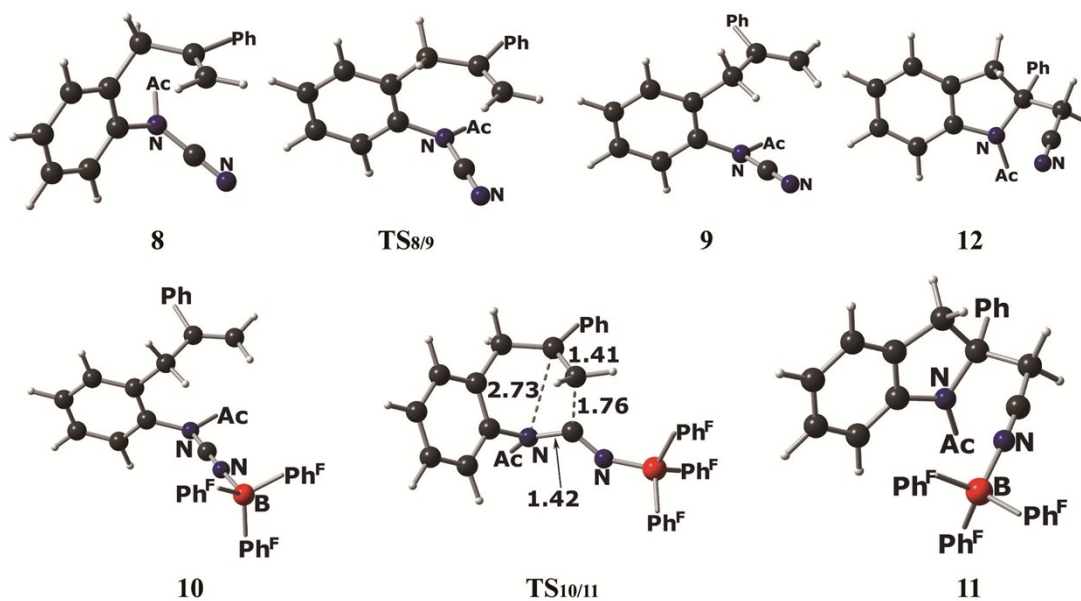

**Figure S6.** Optimized structures of intermediates, transition states and products in the intramolecular addition of the reactant *a* in toluene. All bond lengths are in Å.

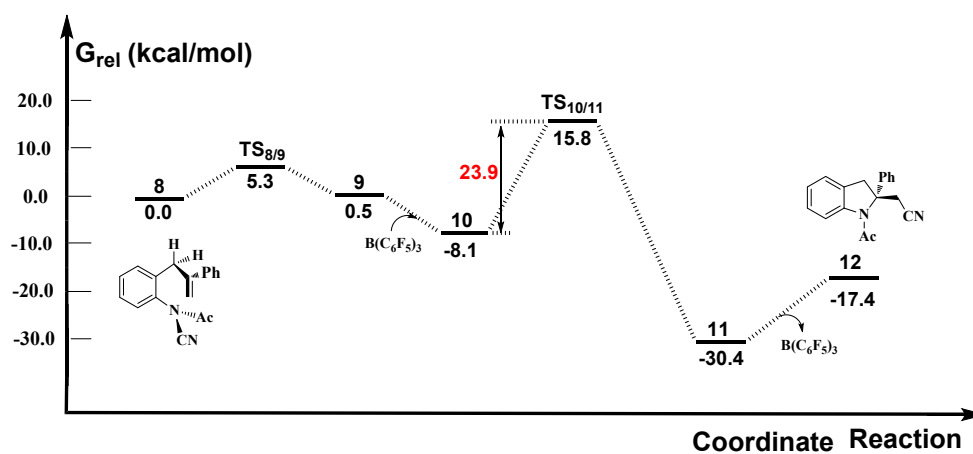

**Figure S7.** Gibbs free energy profiles of the intramolecular addition of the reactant *a* catalyzed by  $B(C_6F_5)_3$  in toluene. Relative free energies calculated at 298.15 K and 1 atm (with respect to that of the reactants) are given.



The intramolecular oxycyanation of the substrate *b* catalyzed by  $B(C_6F_5)_3$

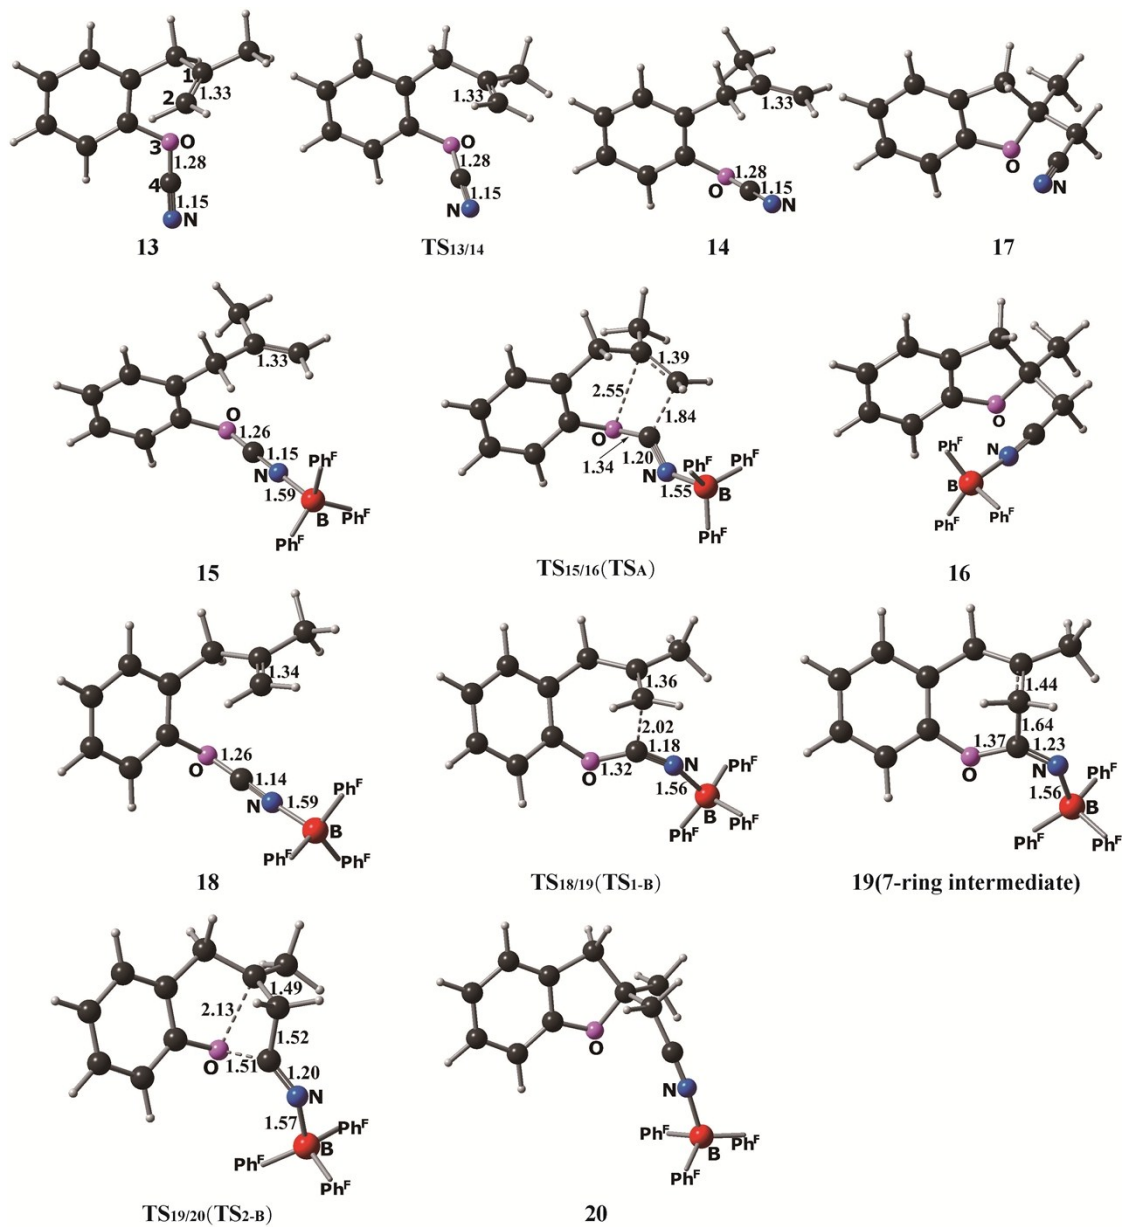

**Figure S8.** Optimized structures of intermediates, transition states and products in the intramolecular oxycyanation of the substrate *b* catalyzed by  $B(C_6F_5)_3$  in tetrahydrofuran. All bond lengths are in Å.

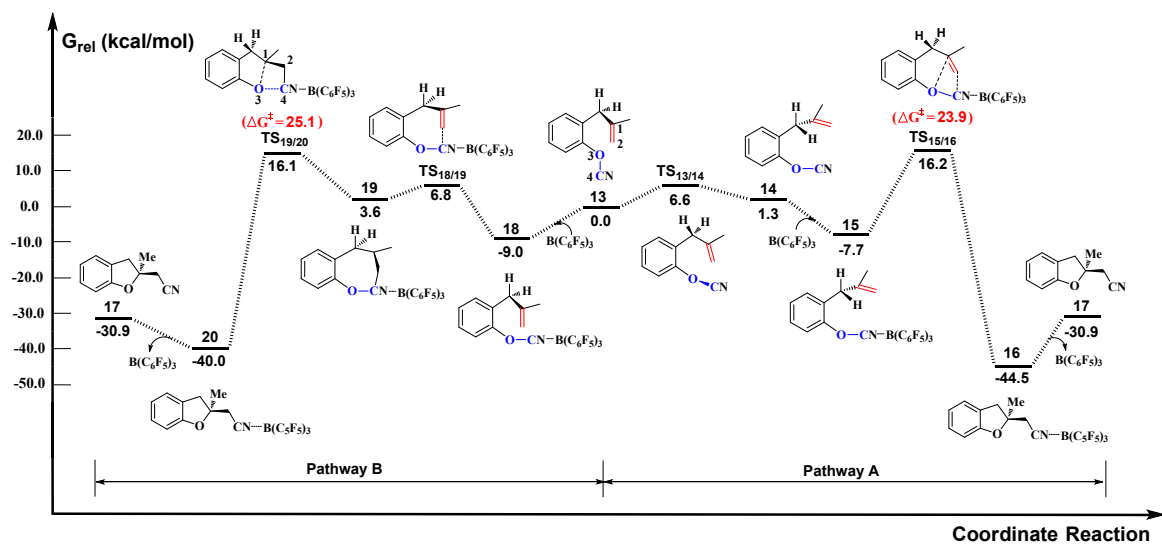

**Figure S9.** Gibbs free energy profiles of intramolecular oxycyanation of the substrate **b** catalyzed by  $\text{B}(\text{C}_6\text{F}_5)_3$  in tetrahydrofuran. Relative free energies calculated at 298.15 K and 1 atm (with respect to that of the reactants) are given.

**Table S1.** Cartesian coordinates and energies of all species.

| 1                                              |            |            |            | TS <sub>1/2</sub>                              |            |            |            |
|------------------------------------------------|------------|------------|------------|------------------------------------------------|------------|------------|------------|
| M06 free energy in solution: -1354.363901 a.u. |            |            |            | M06 free energy in solution: -1354.351391 a.u. |            |            |            |
| Symbol                                         | X          | Y          | Z          | Symbol                                         | X          | Y          | Z          |
| C                                              | 2.4870390  | 2.5951360  | -0.4947690 | C                                              | 2.7868180  | 2.6784580  | -0.1028010 |
| C                                              | 2.2048070  | 1.2348810  | -0.4003250 | C                                              | 2.5003390  | 1.3119330  | 0.0196390  |
| C                                              | 1.0019030  | 0.8740210  | 0.2111070  | C                                              | 1.1730670  | 0.9812510  | 0.2977290  |
| C                                              | 0.1138580  | 1.8129140  | 0.7207200  | C                                              | 0.1986680  | 1.9592430  | 0.5103590  |
| C                                              | 0.4182640  | 3.1647940  | 0.6122150  | C                                              | 0.5157110  | 3.3000770  | 0.3879000  |
| C                                              | 1.6044730  | 3.5513870  | -0.0002990 | C                                              | 1.8218760  | 3.6576360  | 0.0628610  |
| H                                              | 3.4173490  | 2.9066320  | -0.9563230 | H                                              | 3.8090530  | 2.9679590  | -0.3240250 |
| H                                              | -0.7989330 | 1.4802530  | 1.2038450  | H                                              | -0.8047690 | 1.6499760  | 0.7795620  |
| H                                              | -0.2643910 | 3.9062300  | 1.0078040  | H                                              | -0.2422940 | 4.0561270  | 0.5490840  |
| H                                              | 1.8501120  | 4.6029870  | -0.0866150 | H                                              | 2.0909660  | 4.7016020  | -0.0430440 |
| C                                              | 0.5927310  | -1.0683810 | 1.5535560  | C                                              | 0.6295670  | -0.9671080 | 1.5927880  |
| N                                              | 0.4982860  | -1.5316030 | 2.6048140  | N                                              | 0.5126470  | -1.4522540 | 2.6321360  |
| C                                              | 3.1647940  | 0.1829980  | -0.8802440 | C                                              | 3.6940600  | 0.3698270  | -0.0822780 |
| H                                              | 3.9412180  | 0.6525150  | -1.4934670 | H                                              | 4.4028710  | 0.7088950  | 0.6790010  |
| H                                              | 2.6396000  | -0.5151080 | -1.5394170 | H                                              | 4.1713240  | 0.5601520  | -1.0502650 |
| C                                              | 3.8351060  | -0.6095040 | 0.2270950  | C                                              | 3.4875820  | -1.1183110 | 0.0774320  |
| C                                              | 3.8301050  | -0.2371700 | 1.5037730  | C                                              | 3.6544650  | -1.7104830 | 1.2561830  |
| H                                              | 3.3276000  | 0.6627950  | 1.8412510  | H                                              | 3.9185350  | -1.1438310 | 2.1431460  |
| H                                              | 4.3286760  | -0.8358450 | 2.2572700  | H                                              | 3.5068900  | -2.7780520 | 1.3763450  |
| C                                              | 4.5139780  | -1.8642790 | -0.2460650 | C                                              | 3.1723800  | -1.8788420 | -1.1817340 |
| H                                              | 5.0531590  | -2.3570570 | 0.5628150  | H                                              | 2.7522270  | -2.8613360 | -0.9663780 |
| H                                              | 3.7727960  | -2.5626080 | -0.6477980 | H                                              | 2.4727520  | -1.3277500 | -1.8137750 |
| H                                              | 5.2178630  | -1.6433290 | -1.0543800 | H                                              | 4.0883810  | -2.0101980 | -1.7677000 |
| S                                              | -0.2776170 | -1.2731600 | -0.9009290 | S                                              | -0.2060970 | -1.0938950 | -0.8751960 |
| O                                              | 0.1760000  | -0.6663320 | -2.1282380 | O                                              | 0.2249810  | -0.4168240 | -2.0741720 |
| O                                              | -0.1814490 | -2.6892060 | -0.6495290 | O                                              | -0.0803460 | -2.5183280 | -0.6899510 |
| C                                              | -1.9078470 | -0.7097700 | -0.5285740 | C                                              | -1.8615680 | -0.6057410 | -0.4971090 |
| C                                              | -2.3896290 | 0.4384260  | -1.1467840 | C                                              | -2.4179430 | 0.4805410  | -1.1622100 |
| C                                              | -2.6397540 | -1.3915730 | 0.4397470  | C                                              | -2.5559250 | -1.3050020 | 0.4861830  |
| C                                              | -3.6458540 | 0.9048890  | -0.7842380 | C                                              | -3.7055580 | 0.8733960  | -0.8242250 |
| H                                              | -1.7938630 | 0.9440990  | -1.8968790 |                                                |            |            |            |
| C                                              | -3.8896110 | -0.9030710 | 0.7872200  |                                                |            |            |            |
| H                                              | -2.2384880 | -2.2865780 | 0.8998080  |                                                |            |            |            |
| C                                              | -4.4085700 | 0.2460390  | 0.1829870  |                                                |            |            |            |
| H                                              | -4.0403630 | 1.7955340  | -1.2596400 |                                                |            |            |            |
| H                                              | -4.4734900 | -1.4226430 | 1.5383540  |                                                |            |            |            |

|   |            |            |            |
|---|------------|------------|------------|
| H | -1.8524360 | 0.9933310  | -1.9307190 |
| C | -3.8379280 | -0.8883700 | 0.8110450  |
| H | -2.1052110 | -2.1613310 | 0.9733970  |
| C | -4.4272660 | 0.2033780  | 0.1670440  |
| H | -4.1600070 | 1.7106610  | -1.3417390 |
| H | -4.3937670 | -1.4246310 | 1.5716640  |
| C | -5.8097440 | 0.6577020  | 0.5485120  |
| H | -5.7589970 | 1.3487170  | 1.3943980  |
| H | -6.2971700 | 1.1752300  | -0.2779990 |
| H | -6.4313270 | -0.1870270 | 0.8470930  |
| N | 0.7533290  | -0.4038120 | 0.3841750  |

2

M06 free energy in solution: -1354.362918 a.u.

| Symbol | X          | Y          | Z          |
|--------|------------|------------|------------|
| C      | 2.9610090  | 2.4149780  | 0.2426900  |
| C      | 2.4994410  | 1.1154840  | 0.4494880  |
| C      | 1.1175350  | 0.9468200  | 0.5833580  |
| C      | 0.2331030  | 2.0179470  | 0.5389450  |
| C      | 0.7199190  | 3.2996000  | 0.3167370  |
| C      | 2.0877120  | 3.4942070  | 0.1660640  |
| H      | 4.0280140  | 2.5779160  | 0.1375270  |
| H      | -0.8253280 | 1.8389370  | 0.6874720  |
| H      | 0.0364720  | 4.1382530  | 0.2757530  |
| H      | 2.4792350  | 4.4903200  | -0.0016270 |
| N      | 0.5760780  | -0.3772110 | 0.7834960  |
| C      | 0.8197470  | -1.0486800 | 1.9104440  |
| N      | 1.0406950  | -1.6102590 | 2.8937000  |
| C      | 3.4621230  | -0.0499880 | 0.5315020  |
| H      | 3.3443900  | -0.5669440 | 1.4877970  |
| H      | 4.4777090  | 0.3578520  | 0.5101110  |
| C      | 3.3071880  | -1.0400570 | -0.6045850 |
| C      | 3.0477410  | -2.3223140 | -0.3667560 |
| H      | 2.9163070  | -2.6985470 | 0.6429740  |
| H      | 2.9400500  | -3.0328920 | -1.1787320 |
| C      | 3.4725840  | -0.4778200 | -1.9878870 |
| H      | 2.7098080  | 0.2810080  | -2.1826260 |
| H      | 4.4521950  | 0.0003940  | -2.0936590 |
| H      | 3.3759860  | -1.2573760 | -2.7434280 |
| S      | -0.2324650 | -1.1962140 | -0.5040230 |
| O      | 0.3386290  | -0.6799000 | -1.7226630 |

|   |            |            |            |
|---|------------|------------|------------|
| O | -0.1934550 | -2.5905070 | -0.1396530 |
| C | -1.8941360 | -0.6050160 | -0.3665900 |
| C | -2.3412850 | 0.3693720  | -1.2484600 |
| C | -2.7031580 | -1.1121760 | 0.6459290  |
| C | -3.6397230 | 0.8442220  | -1.1082010 |
| H | -1.6845320 | 0.7394570  | -2.0260600 |
| C | -3.9921440 | -0.6198620 | 0.7693990  |
| H | -2.3310380 | -1.8808280 | 1.3132930  |
| C | -4.4775550 | 0.3616770  | -0.1021580 |
| H | -4.0062600 | 1.6007830  | -1.7925720 |
| H | -4.6369600 | -1.0039670 | 1.5517270  |
| C | -5.8904550 | 0.8601550  | 0.0345490  |
| H | -6.5901640 | 0.1283550  | -0.3776960 |
| H | -6.1505290 | 1.0107150  | 1.0834770  |
| H | -6.0325980 | 1.8002290  | -0.4980110 |

TS<sub>2/3</sub>

M06 free energy in solution: -1354.282246 a.u.

| Symbol | X          | Y          | Z          |
|--------|------------|------------|------------|
| C      | 2.6113690  | 2.8224960  | -0.2675000 |
| C      | 2.3751070  | 1.4518310  | -0.2382300 |
| C      | 1.1084550  | 0.9856700  | 0.1216600  |
| C      | 0.0917510  | 1.8662650  | 0.4831010  |
| C      | 0.3352230  | 3.2321800  | 0.4263170  |
| C      | 1.5880760  | 3.7085880  | 0.0465730  |
| H      | 3.5930790  | 3.1942360  | -0.5381610 |
| H      | -0.8641870 | 1.4849350  | 0.8208760  |
| H      | -0.4498400 | 3.9268890  | 0.6976140  |
| H      | 1.7715090  | 4.7754790  | 0.0109760  |
| N      | 0.9967110  | -0.4406530 | 0.2048020  |
| C      | 1.2429320  | -0.9871910 | 1.6083660  |
| N      | 0.4760880  | -1.3658220 | 2.4368900  |
| C      | 3.4033140  | 0.4024860  | -0.5745880 |
| H      | 4.3985910  | 0.7490830  | -0.2697870 |
| H      | 3.4261840  | 0.2287380  | -1.6533280 |
| C      | 3.1280610  | -0.8819480 | 0.1510830  |
| C      | 2.9239500  | -0.9123120 | 1.5739840  |
| H      | 3.2087040  | -0.0029350 | 2.1013650  |
| H      | 3.2607560  | -1.8179720 | 2.0685750  |
| C      | 3.2595810  | -2.1619580 | -0.5934780 |
| H      | 2.8606360  | -2.0804600 | -1.6056260 |

|   |            |            |            |
|---|------------|------------|------------|
| H | 4.3311860  | -2.3906180 | -0.6700020 |
| H | 2.7674760  | -2.9804130 | -0.0681370 |
| S | -0.0949970 | -1.2354270 | -0.8323500 |
| O | 0.2553890  | -0.7443100 | -2.1535080 |
| O | 0.0371710  | -2.6397770 | -0.5159020 |
| C | -1.7338740 | -0.6819080 | -0.4488860 |
| C | -2.3143420 | -1.0702430 | 0.7555470  |
| C | -2.3870550 | 0.1459880  | -1.3515020 |
| C | -3.5881360 | -0.6092510 | 1.0472340  |
| H | -1.7528710 | -1.6764220 | 1.4580970  |
| C | -3.6654490 | 0.5919930  | -1.0372110 |
| H | -1.8989790 | 0.4308390  | -2.2751290 |
| C | -4.2802780 | 0.2225560  | 0.1592580  |
| H | -4.0553150 | -0.8938500 | 1.9836370  |
| H | -4.1902280 | 1.2382380  | -1.7316420 |
| C | -5.6715900 | 0.6902040  | 0.4910930  |
| H | -5.9655720 | 1.5349210  | -0.1320340 |
| H | -6.3908500 | -0.1167920 | 0.3283380  |
| H | -5.7429750 | 0.9882710  | 1.5384830  |

3

M06 free energy in solution: -1354.402382 a.u.

| Symbol | X          | Y          | Z          |
|--------|------------|------------|------------|
| C      | 3.4832280  | 1.5553790  | 1.1936240  |
| C      | 2.6141750  | 0.5229890  | 0.8863980  |
| C      | 1.8850820  | 0.5409230  | -0.3008840 |
| C      | 2.0206440  | 1.5879480  | -1.2078400 |
| C      | 2.8933820  | 2.6246120  | -0.8809630 |
| C      | 3.6205800  | 2.6188350  | 0.3037220  |
| H      | 4.0468490  | 1.5336700  | 2.1196580  |
| H      | 1.4865460  | 1.5927570  | -2.1460110 |
| H      | 3.0082390  | 3.4454370  | -1.5786200 |
| H      | 4.2951600  | 3.4344100  | 0.5318040  |
| N      | 1.0842650  | -0.6297200 | -0.3781530 |
| C      | -0.6257850 | -0.8055550 | 2.1039520  |
| N      | -1.1448390 | 0.0963560  | 2.5905340  |
| C      | 2.2921580  | -0.7076050 | 1.6864650  |
| H      | 1.7964750  | -0.4379720 | 2.6233070  |
| H      | 3.1883390  | -1.2784100 | 1.9375470  |
| C      | 1.3605930  | -1.5523480 | 0.7717570  |
| C      | 0.0726150  | -1.9515770 | 1.5199810  |

|   |            |            |            |
|---|------------|------------|------------|
| H | 0.3519400  | -2.6223860 | 2.3367480  |
| H | -0.6071330 | -2.4994910 | 0.8644590  |
| C | 2.0785840  | -2.8066660 | 0.2775060  |
| H | 2.9786360  | -2.5115270 | -0.2655500 |
| H | 2.3743980  | -3.4206940 | 1.1317830  |
| H | 1.4418540  | -3.3911550 | -0.3851930 |
| S | -0.1011030 | -0.9019820 | -1.5093130 |
| O | 0.2933800  | -0.2071740 | -2.7159510 |
| O | -0.3389220 | -2.3332820 | -1.5245800 |
| C | -1.5599140 | -0.1264120 | -0.8599730 |
| C | -1.5741180 | 1.2554030  | -0.6902530 |
| C | -2.6406920 | -0.9147570 | -0.4912090 |
| C | -2.6857190 | 1.8421970  | -0.1108140 |
| H | -0.7282010 | 1.8605250  | -0.9948420 |
| C | -3.7514460 | -0.3039010 | 0.0785510  |
| H | -2.6094410 | -1.9851670 | -0.6543210 |
| C | -3.7830430 | 1.0729940  | 0.2910590  |
| H | -2.7038860 | 2.9157310  | 0.0398380  |
| H | -4.6023700 | -0.9096740 | 0.3689980  |
| C | -4.9584000 | 1.7261670  | 0.9650340  |
| H | -5.8391640 | 1.0843990  | 0.9376770  |
| H | -4.7196120 | 1.9294350  | 2.0124750  |
| H | -5.2041810 | 2.6772610  | 0.4901400  |

B(C<sub>6</sub>F<sub>5</sub>)<sub>3</sub>

M06 free energy in solution: -2208.062144 a.u.

| Symbol | X          | Y          | Z          |
|--------|------------|------------|------------|
| B      | -1.4801400 | -0.3128700 | -0.1263000 |
| C      | -1.7873800 | -0.8232000 | 1.3896400  |
| C      | -1.6069200 | 0.0625600  | 2.4451100  |
| C      | -2.2382200 | -2.0872000 | 1.7427600  |
| C      | -1.8401800 | -0.2630100 | 3.7692500  |
| C      | -2.4860800 | -2.4541100 | 3.0573600  |
| C      | -2.2842500 | -1.5385500 | 4.0754900  |
| C      | -2.3948400 | 0.9648000  | -0.5408600 |
| C      | -1.9323000 | 1.9960100  | -1.3460100 |
| C      | -3.7098900 | 1.0905900  | -0.1124100 |
| C      | -2.6903400 | 3.1077100  | -1.6730400 |
| C      | -4.5074500 | 2.1791100  | -0.4280700 |
| C      | -3.9902300 | 3.1996900  | -1.2082000 |
| C      | -1.4184700 | -1.4891400 | -1.2471900 |

|   |            |            |            |
|---|------------|------------|------------|
| C | -0.4651200 | -2.4928300 | -1.1306900 |
| C | -2.2476100 | -1.5878000 | -2.3549300 |
| C | -0.3094300 | -3.5200100 | -2.0392100 |
| C | -2.1324500 | -2.6095600 | -3.2903000 |
| C | -1.1565600 | -3.5769100 | -3.1349300 |
| F | -0.6890300 | 1.9563600  | -1.8639700 |
| F | -2.1803100 | 4.0791100  | -2.4269200 |
| F | -4.7372700 | 4.2530400  | -1.5142100 |
| F | -5.7606800 | 2.2530000  | 0.0076100  |
| F | -4.2757500 | 0.1256600  | 0.6207900  |
| F | -3.2169000 | -0.6957300 | -2.5771200 |
| F | -2.9494600 | -2.6614200 | -4.3372600 |
| F | -1.0318400 | -4.5531000 | -4.0249900 |
| F | 0.6337500  | -4.4475000 | -1.8705300 |
| F | 0.3540900  | -2.5035200 | -0.0614300 |
| F | -1.1937900 | 1.3157900  | 2.1936200  |
| F | -1.6479800 | 0.6264300  | 4.7375900  |
| F | -2.4718600 | -3.0228400 | 0.8153800  |
| F | -2.9177300 | -3.6781600 | 3.3478500  |
| F | -2.5150100 | -1.8814300 | 5.3361700  |

---

4

M06 free energy in solution: -3562.442218 a.u.

| Symbol | X          | Y          | Z          |
|--------|------------|------------|------------|
| C      | -5.4962110 | 1.2531980  | 0.3569940  |
| C      | -4.3997310 | 0.5164570  | -0.0912610 |
| C      | -3.7834010 | -0.3198730 | 0.8447560  |
| C      | -4.2135680 | -0.4154530 | 2.1627890  |
| C      | -5.3156040 | 0.3208250  | 2.5713570  |
| C      | -5.9564190 | 1.1562100  | 1.6640100  |
| H      | -5.9953560 | 1.9148470  | -0.3416570 |
| H      | -3.6922440 | -1.0677730 | 2.8502090  |
| H      | -5.6637240 | 0.2461120  | 3.5933990  |
| H      | -6.8152390 | 1.7388060  | 1.9743450  |
| N      | -2.6237620 | -1.1049890 | 0.4546770  |
| C      | -1.5579790 | -0.5068300 | 0.0146350  |
| N      | -0.5968860 | 0.0141600  | -0.3418350 |
| C      | -3.9139890 | 0.6637450  | -1.5180810 |
| H      | -2.9623090 | 1.2063250  | -1.5332010 |
| H      | -4.6372620 | 1.2981130  | -2.0399390 |
| C      | -3.7754970 | -0.6379350 | -2.2818310 |

|   |            |            |            |
|---|------------|------------|------------|
| C | -2.6863850 | -0.8973490 | -2.9996920 |
| H | -1.8551070 | -0.2025020 | -3.0435390 |
| H | -2.6007260 | -1.8158050 | -3.5695940 |
| C | -4.9527720 | -1.5699040 | -2.2172670 |
| H | -5.1704840 | -1.8688140 | -1.1869680 |
| H | -5.8510120 | -1.0715260 | -2.5968750 |
| H | -4.7704590 | -2.4720210 | -2.7995010 |
| S | -2.6023770 | -2.8969000 | 0.4610060  |
| O | -3.5793140 | -3.2090510 | 1.4696150  |
| O | -2.7398370 | -3.3535990 | -0.8947190 |
| C | -0.9510160 | -3.1487100 | 1.0148480  |
| C | -0.6195740 | -2.7812190 | 2.3167730  |
| C | -0.0142050 | -3.6655470 | 0.1264960  |
| C | 0.6945900  | -2.9243530 | 2.7256850  |
| H | -1.3669130 | -2.3762140 | 2.9884180  |
| C | 1.2905560  | -3.8283050 | 0.5723380  |
| H | -0.3063570 | -3.9352580 | -0.8812900 |
| C | 1.6653520  | -3.4496020 | 1.8637270  |
| H | 0.9749250  | -2.6239890 | 3.7294900  |
| H | 2.0343130  | -4.2482760 | -0.0955930 |
| C | 3.0821880  | -3.6172790 | 2.3339050  |
| H | 3.7686470  | -3.6973100 | 1.4921120  |
| H | 3.3847990  | -2.7683090 | 2.9487280  |
| H | 3.1697100  | -4.5217010 | 2.9420990  |
| B | 0.8279050  | 0.6763840  | -0.3693340 |
| C | 0.6467710  | 2.1438280  | -1.0530690 |
| C | -0.3902270 | 2.9652840  | -0.6299460 |
| C | 1.4928530  | 2.6949670  | -2.0054920 |
| C | -0.6084410 | 4.2395210  | -1.1241670 |
| C | 1.3136310  | 3.9698720  | -2.5209610 |
| C | 0.2554630  | 4.7449420  | -2.0804540 |
| C | 1.3545010  | 0.8818300  | 1.1605490  |
| C | 0.6981910  | 0.5857920  | 2.3444680  |
| C | 2.6273620  | 1.4203320  | 1.3142420  |
| C | 1.2771390  | 0.7588260  | 3.5948980  |
| C | 3.2344600  | 1.6277680  | 2.5376720  |
| C | 2.5498500  | 1.2869770  | 3.6942660  |
| C | 1.6949940  | -0.3996770 | -1.2377940 |
| C | 1.3880910  | -0.5873500 | -2.5817340 |
| C | 2.6686350  | -1.2493100 | -0.7363170 |
| C | 1.9886310  | -1.5386410 | -3.3850050 |

|   |            |            |            |
|---|------------|------------|------------|
| C | 3.2939670  | -2.2193490 | -1.5070860 |
| C | 2.9531320  | -2.3695110 | -2.8367860 |
| F | -0.5538790 | 0.0891640  | 2.3609880  |
| F | 0.6109780  | 0.4131400  | 4.6966710  |
| F | 3.1131370  | 1.4648660  | 4.8838440  |
| F | 4.4617160  | 2.1335020  | 2.6184240  |
| F | 3.3416410  | 1.7137040  | 0.2195460  |
| F | 3.0427740  | -1.2076580 | 0.5495650  |
| F | 4.1855460  | -3.0448060 | -0.9538170 |
| F | 3.5332900  | -3.3046510 | -3.5784500 |
| F | 1.6509290  | -1.6688930 | -4.6644310 |
| F | 0.4598480  | 0.1870220  | -3.1609180 |
| F | -1.2446460 | 2.5279110  | 0.3125360  |
| F | -1.6276960 | 4.9775400  | -0.6897670 |
| F | 2.5341150  | 2.0056040  | -2.4810350 |
| F | 2.1463670  | 4.4539650  | -3.4389130 |
| F | 0.0704960  | 5.9656430  | -2.5695190 |

TS<sub>4/5</sub>

M06 free energy in solution: -3562.395875 a.u.

| Symbol | X         | Y          | Z          |
|--------|-----------|------------|------------|
| C      | 4.3990020 | -3.4802410 | 1.2711920  |
| C      | 3.6595300 | -2.7059640 | 0.3786300  |
| C      | 3.6450460 | -1.3131310 | 0.5537790  |
| C      | 4.3745720 | -0.7289470 | 1.5875890  |
| C      | 5.1198580 | -1.5193890 | 2.4491110  |
| C      | 5.1276970 | -2.9007320 | 2.2988650  |
| H      | 4.4045630 | -4.5571640 | 1.1446750  |
| H      | 4.3740710 | 0.3463100  | 1.7048340  |
| H      | 5.6860260 | -1.0501140 | 3.2437080  |
| H      | 5.7026200 | -3.5234780 | 2.9724050  |
| N      | 2.8731030 | -0.4933780 | -0.3387040 |
| C      | 1.5307330 | -0.8441220 | -0.6538770 |
| N      | 0.5339070 | -0.4213660 | -0.1364590 |
| C      | 2.8664480 | -3.4311810 | -0.7088260 |
| H      | 1.9049130 | -3.7632890 | -0.3077700 |
| H      | 3.4452020 | -4.3063730 | -1.0190500 |
| C      | 2.6561080 | -2.5393500 | -1.8834030 |
| C      | 1.4100470 | -1.9287640 | -2.0449690 |
| H      | 0.5361870 | -2.5035170 | -1.7567570 |
| H      | 1.2792700 | -1.2712550 | -2.8991080 |

|   |            |            |            |
|---|------------|------------|------------|
| C | 3.8231900  | -2.1606920 | -2.6999730 |
| H | 4.7431510  | -2.1346310 | -2.1118670 |
| H | 3.9393360  | -2.9600170 | -3.4482230 |
| H | 3.6630110  | -1.2225690 | -3.2302750 |
| S | 3.3485730  | 0.9934640  | -0.9769390 |
| O | 4.7624410  | 1.1204910  | -0.7047560 |
| O | 2.8689240  | 0.9980980  | -2.3470860 |
| C | 2.3929630  | 2.1910740  | -0.0781190 |
| C | 1.9774070  | 1.9464090  | 1.2277490  |
| C | 2.0944380  | 3.3815750  | -0.7289530 |
| C | 1.2587020  | 2.9293010  | 1.8885790  |
| H | 2.1569010  | 0.9902230  | 1.7038500  |
| C | 1.3825470  | 4.3576270  | -0.0404250 |
| H | 2.3991380  | 3.5366900  | -1.7571840 |
| C | 0.9557950  | 4.1475860  | 1.2709430  |
| H | 0.9068640  | 2.7420740  | 2.8973880  |
| H | 1.1359450  | 5.2877540  | -0.5413230 |
| C | 0.1418010  | 5.1763410  | 2.0058540  |
| H | 0.0798780  | 6.1087540  | 1.4457930  |
| H | -0.8733760 | 4.8020800  | 2.1574360  |
| H | 0.5760410  | 5.3818930  | 2.9863100  |
| B | -0.9829090 | -0.2268630 | -0.0589110 |
| C | -1.7867560 | -1.4857210 | -0.7455350 |
| C | -1.4500180 | -2.7754440 | -0.3561410 |
| C | -2.8464190 | -1.3981260 | -1.6368680 |
| C | -2.0796210 | -3.9150690 | -0.8251870 |
| C | -3.5132890 | -2.5127460 | -2.1259060 |
| C | -3.1267700 | -3.7783100 | -1.7206000 |
| C | -1.4402000 | -0.1972310 | 1.5072590  |
| C | -0.6455250 | -0.4686870 | 2.6092260  |
| C | -2.7748620 | 0.0669460  | 1.7868170  |
| C | -1.1345380 | -0.4550690 | 3.9099810  |
| C | -3.3031220 | 0.0882840  | 3.0628220  |
| C | -2.4688730 | -0.1772550 | 4.1376280  |
| C | -1.1572940 | 1.2086270  | -0.8346910 |
| C | -0.8404960 | 1.2746340  | -2.1865150 |
| C | -1.4712780 | 2.4276980  | -0.2525730 |
| C | -0.8356110 | 2.4392870  | -2.9304940 |
| C | -1.4842700 | 3.6200230  | -0.9629150 |
| C | -1.1609840 | 3.6306810  | -2.3045250 |
| F | 0.6590250  | -0.7657430 | 2.4837030  |

|   |            |            |            |   |            |           |            |
|---|------------|------------|------------|---|------------|-----------|------------|
| F | -0.3279870 | -0.7155350 | 4.9393130  | H | 4.3038920  | 0.3531130 | -3.9611480 |
| F | -2.9504310 | -0.1646760 | 5.3770540  | S | 3.6976270  | 1.8447950 | -1.3484900 |
| F | -4.5888500 | 0.3635570  | 3.2726450  | O | 4.9427440  | 2.2431490 | -0.7292890 |
| F | -3.6054630 | 0.3518470  | 0.7733540  | O | 3.4091660  | 2.2276310 | -2.7202370 |
| F | -1.7527940 | 2.5367090  | 1.0535660  | C | 2.3592330  | 2.4361610 | -0.3397920 |
| F | -1.7433750 | 4.7721670  | -0.3420400 | C | 2.2971070  | 2.0671000 | 1.0030340  |
| F | -1.1278830 | 4.7778240  | -2.9763720 | C | 1.4746770  | 3.3587850 | -0.8814600 |
| F | -0.5185510 | 2.4297060  | -4.2228650 | C | 1.3442460  | 2.6617580 | 1.8120840  |
| F | -0.5208630 | 0.1443760  | -2.8434070 | H | 2.9796480  | 1.3297070 | 1.4105920  |
| F | -0.4316680 | -2.9618430 | 0.5091830  | C | 0.5346020  | 3.9559640 | -0.0462080 |
| F | -1.6885780 | -5.1272960 | -0.4324440 | H | 1.5453160  | 3.6272690 | -1.9284560 |
| F | -3.2830140 | -0.2130440 | -2.0724730 | C | 0.4815470  | 3.6457910 | 1.3114260  |
| F | -4.5218800 | -2.3785420 | -2.9834650 | H | 1.2900050  | 2.3913720 | 2.8612540  |
| F | -3.7530320 | -4.8527820 | -2.1881480 | H | -0.1397910 | 4.7023820 | -0.4519860 |

5

M06 free energy in solution: -3562.482159 a.u.

| Symbol | X          | Y          | Z          |   |            |            |            |
|--------|------------|------------|------------|---|------------|------------|------------|
| C      | 4.5247350  | -2.9837950 | 0.1603640  | H | 0.1649440  | 5.0231030  | 2.9095010  |
| C      | 4.0023930  | -1.9737130 | -0.6250430 | B | -1.2363030 | -0.3132910 | -0.1163400 |
| C      | 4.2811780  | -0.6377750 | -0.3402160 | C | -2.1744320 | -1.5066790 | -0.7239930 |
| C      | 5.0895180  | -0.2844040 | 0.7320410  | C | -1.5934660 | -2.7289750 | -1.0373130 |
| C      | 5.6059590  | -1.3140970 | 1.5197420  | C | -3.5495470 | -1.4393250 | -0.9028760 |
| C      | 5.3344310  | -2.6486230 | 1.2453280  | C | -2.3015870 | -3.8168000 | -1.5152700 |
| H      | 4.2993810  | -4.0205110 | -0.0631290 | C | -4.2973720 | -2.5071800 | -1.3771380 |
| H      | 5.3358500  | 0.7456490  | 0.9438250  | C | -3.6704430 | -3.7003530 | -1.6888110 |
| H      | 6.2380520  | -1.0564290 | 2.3608730  | C | -0.6508620 | -0.8011780 | 1.3169000  |
| H      | 5.7504110  | -3.4266080 | 1.8726670  | C | 0.6778500  | -1.0054170 | 1.6496400  |
| N      | 3.5866890  | 0.1837670  | -1.2790680 | C | -1.5669080 | -1.1217500 | 2.3119960  |
| C      | 0.7545700  | -0.1653100 | -1.9595580 | C | 1.0882660  | -1.4567120 | 2.8963600  |
| N      | -0.0431750 | -0.1943370 | -1.1461140 | C | -1.2047030 | -1.5773960 | 3.5651950  |
| C      | 3.0463320  | -2.0594500 | -1.7818600 | C | 0.1402020  | -1.7451370 | 3.8595790  |
| H      | 2.0369320  | -2.2594240 | -1.4064960 | C | -1.9478720 | 1.1497880  | -0.1378820 |
| H      | 3.3022950  | -2.8356220 | -2.5047600 | C | -2.3090870 | 1.6959360  | -1.3647410 |
| C      | 3.1391950  | -0.6585150 | -2.4317210 | C | -2.2986230 | 1.9103000  | 0.9680230  |
| C      | 1.7787980  | -0.1962900 | -2.9904450 | C | -2.9614760 | 2.9059110  | -1.5101350 |
| H      | 1.4434850  | -0.9069540 | -3.7516140 | C | -2.9995590 | 3.1044950  | 0.8687470  |
| H      | 1.8480810  | 0.7938100  | -3.4445780 | C | -3.3141630 | 3.6171020  | -0.3751850 |
| C      | 4.1766090  | -0.6487880 | -3.5535270 | F | 1.6588160  | -0.7807140 | 0.7614660  |
| H      | 5.1315690  | -0.9973050 | -3.1546850 | F | 2.3829810  | -1.6186890 | 3.1602340  |
| H      | 3.8674230  | -1.3271390 | -4.3519970 | F | 0.5113190  | -2.1825820 | 5.0571350  |
|        |            |            |            | F | -2.1230980 | -1.8544840 | 4.4863180  |



|   |            |            |            |
|---|------------|------------|------------|
| F | -2.8739630 | -0.9602470 | 2.0702890  |
| F | -1.9779840 | 1.5333870  | 2.2117550  |
| F | -3.3562900 | 3.7736820  | 1.9632700  |
| F | -3.9498820 | 4.7774950  | -0.4795310 |
| F | -3.2692260 | 3.3787620  | -2.7149760 |
| F | -2.0527730 | 1.0143950  | -2.4937970 |
| F | -0.2678550 | -2.8958380 | -0.8706100 |
| F | -1.6877180 | -4.9618430 | -1.8048830 |
| F | -4.2319600 | -0.3278850 | -0.6107520 |
| F | -5.6130110 | -2.3939460 | -1.5333520 |
| F | -4.3753580 | -4.7269210 | -2.1475360 |

6

M06 free energy in solution: -3562.446958 a.u.

| Symbol | X          | Y          | Z          |
|--------|------------|------------|------------|
| C      | 4.9945540  | -3.2458120 | 0.1090370  |
| C      | 4.0396600  | -2.5523520 | -0.6273880 |
| C      | 3.5886330  | -1.3414200 | -0.0999820 |
| C      | 4.0417970  | -0.8220400 | 1.1025140  |
| C      | 4.9959810  | -1.5358240 | 1.8184970  |
| C      | 5.4716800  | -2.7418360 | 1.3168320  |
| H      | 5.3622990  | -4.1940350 | -0.2661820 |
| H      | 3.6406110  | 0.1147350  | 1.4712300  |
| H      | 5.3620150  | -1.1510220 | 2.7616910  |
| H      | 6.2159660  | -3.2996690 | 1.8719510  |
| C      | 1.3383400  | -0.6262740 | -0.6367740 |
| N      | 0.2025760  | -0.5354650 | -0.4849440 |
| C      | 3.4299710  | -3.0866800 | -1.8943180 |
| H      | 4.0133510  | -3.9387160 | -2.2551500 |
| H      | 3.4781660  | -2.3294190 | -2.6836960 |
| C      | 1.9801140  | -3.5176990 | -1.7091310 |
| C      | 1.5296090  | -4.0023820 | -0.5533190 |
| H      | 2.1688160  | -4.0899140 | 0.3191410  |
| H      | 0.5063180  | -4.3463280 | -0.4589930 |
| C      | 1.1095370  | -3.3670140 | -2.9239580 |
| H      | 0.1152520  | -3.7791750 | -2.7550110 |
| H      | 1.0110920  | -2.3069110 | -3.1864120 |
| H      | 1.5608920  | -3.8658040 | -3.7869870 |
| B      | -1.1564650 | -0.1126110 | 0.1992090  |
| C      | -2.2984490 | 0.0232270  | -0.9442830 |
| C      | -2.0642500 | 0.1255570  | -2.3057280 |

|   |            |            |            |
|---|------------|------------|------------|
| C | -3.6355260 | 0.0173330  | -0.5676900 |
| C | -3.0821000 | 0.1999340  | -3.2458710 |
| C | -4.6801340 | 0.0898720  | -1.4701990 |
| C | -4.3981860 | 0.1769720  | -2.8245900 |
| C | -1.4721920 | -1.3864430 | 1.1654100  |
| C | -1.6800820 | -1.3425190 | 2.5353230  |
| C | -1.5385200 | -2.6481830 | 0.5869020  |
| C | -1.9166270 | -2.4800040 | 3.2935730  |
| C | -1.7598320 | -3.8064210 | 1.3098450  |
| C | -1.9480620 | -3.7191720 | 2.6791760  |
| C | -0.8099700 | 1.2767740  | 0.9900400  |
| C | -1.5763630 | 2.4344570  | 0.9587410  |
| C | 0.3478540  | 1.3690700  | 1.7572380  |
| C | -1.2306080 | 3.5900210  | 1.6477940  |
| C | 0.7442530  | 2.5080610  | 2.4310320  |
| C | -0.0667840 | 3.6286200  | 2.3902920  |
| F | -1.6680140 | -0.1801940 | 3.1971780  |
| F | -2.1071490 | -2.3908760 | 4.6076110  |
| F | -2.1600410 | -4.8161020 | 3.3962210  |
| F | -1.7809950 | -4.9942200 | 0.7069540  |
| F | -1.3775370 | -2.7792290 | -0.7383380 |
| F | 1.1524890  | 0.2975260  | 1.8943340  |
| F | 1.8942690  | 2.5398140  | 3.1019400  |
| F | 0.2910570  | 4.7385560  | 3.0271620  |
| F | -1.9938940 | 4.6789930  | 1.5630720  |
| F | -2.7076350 | 2.5062500  | 0.2494930  |
| F | -0.8113760 | 0.1696380  | -2.7925160 |
| F | -2.8007840 | 0.2981530  | -4.5433060 |
| F | -3.9525820 | -0.0235960 | 0.7329220  |
| F | -5.9446110 | 0.0866900  | -1.0568810 |
| F | -5.3867600 | 0.2494350  | -3.7087670 |
| S | 3.1233200  | 0.5985590  | -2.0914320 |
| O | 4.5570460  | 0.5198840  | -2.0380820 |
| O | 2.3575330  | 0.2680490  | -3.2640100 |
| C | 2.5223980  | 2.0972140  | -1.3914750 |
| C | 3.3003400  | 2.7673580  | -0.4513130 |
| C | 1.2657620  | 2.5503520  | -1.7817860 |
| C | 2.8033100  | 3.9432670  | 0.0894770  |
| H | 4.2783700  | 2.3915960  | -0.1742660 |
| C | 0.7911610  | 3.7273370  | -1.2207460 |
| H | 0.6872850  | 2.0000560  | -2.5142900 |

|   |            |            |            |
|---|------------|------------|------------|
| C | 1.5545800  | 4.4445120  | -0.2956010 |
| H | 3.3961090  | 4.4878280  | 0.8152610  |
| H | -0.1830130 | 4.1014910  | -1.5170300 |
| C | 1.0592080  | 5.7578950  | 0.2437670  |
| H | -0.0244010 | 5.7530220  | 0.3738600  |
| H | 1.5241630  | 5.9946270  | 1.2003470  |
| H | 1.3034100  | 6.5588790  | -0.4592040 |
| N | 2.6190810  | -0.5903470 | -0.8713950 |

TS<sub>6/7</sub>

M06 free energy in solution: -3562.390473 a.u.

| Symbol | X          | Y          | Z          |
|--------|------------|------------|------------|
| C      | 2.5725720  | 5.5946230  | -0.6897000 |
| C      | 1.9275140  | 4.5865270  | 0.0179010  |
| C      | 2.3143880  | 3.2538460  | -0.1566020 |
| C      | 3.3761210  | 2.9405170  | -1.0013540 |
| C      | 4.0309930  | 3.9573720  | -1.6832990 |
| C      | 3.6264970  | 5.2802070  | -1.5368430 |
| H      | 2.2614390  | 6.6246750  | -0.5611430 |
| H      | 3.7025840  | 1.9169690  | -1.1185290 |
| H      | 4.8592460  | 3.7107500  | -2.3353160 |
| H      | 4.1384100  | 6.0678210  | -2.0755330 |
| C      | 0.2613180  | 1.7493060  | 0.0646120  |
| N      | 0.0026820  | 0.5599110  | 0.0538560  |
| C      | 0.8468010  | 4.8587140  | 1.0287840  |
| H      | 0.2355580  | 5.7160380  | 0.7015650  |
| H      | 1.2632680  | 5.1066490  | 2.0075250  |
| C      | -0.0999250 | 3.7310680  | 1.1240400  |
| C      | -0.5638000 | 3.0523740  | -0.1056970 |
| H      | -0.2682750 | 3.5777660  | -1.0147380 |
| H      | -1.6260490 | 2.8394860  | -0.0986500 |
| C      | -0.7041250 | 3.3387060  | 2.4036650  |
| H      | -1.7499210 | 3.6799340  | 2.3758950  |
| H      | -0.7552610 | 2.2467300  | 2.4787860  |
| H      | -0.1926860 | 3.7628570  | 3.2635480  |
| B      | -1.0920330 | -0.5090890 | -0.2144560 |
| C      | -1.3142850 | -1.2371330 | 1.2492660  |
| C      | -0.1967990 | -1.6978960 | 1.9393570  |
| C      | -2.5138960 | -1.4224010 | 1.9237070  |
| C      | -0.2323650 | -2.2244160 | 3.2164810  |
| C      | -2.5991150 | -1.9576740 | 3.2026670  |

|   |            |            |            |
|---|------------|------------|------------|
| C | -1.4503960 | -2.3519700 | 3.8601640  |
| C | -2.4804310 | 0.1578480  | -0.8069050 |
| C | -3.0688780 | -0.1054740 | -2.0365020 |
| C | -3.1676370 | 1.0895720  | -0.0398950 |
| C | -4.2284910 | 0.5214080  | -2.4792090 |
| C | -4.3168410 | 1.7447830  | -0.4361760 |
| C | -4.8564130 | 1.4549090  | -1.6783680 |
| C | -0.3609430 | -1.5062150 | -1.3035790 |
| C | -0.1346700 | -2.8658510 | -1.1573050 |
| C | 0.1834480  | -0.9462490 | -2.4531400 |
| C | 0.6108150  | -3.6127170 | -2.0624430 |
| C | 0.9148930  | -1.6522180 | -3.3883190 |
| C | 1.1378740  | -3.0038880 | -3.1834140 |
| F | -2.5533410 | -1.0039590 | -2.8846390 |
| F | -4.7406260 | 0.2288490  | -3.6730530 |
| F | -5.9603120 | 2.0682590  | -2.0926400 |
| F | -4.8997770 | 2.6482280  | 0.3537910  |
| F | -2.7062160 | 1.4053390  | 1.1907210  |
| F | 0.0062090  | 0.3651240  | -2.7023810 |
| F | 1.4416380  | -1.0469070 | -4.4551870 |
| F | 1.8869540  | -3.6967390 | -4.0394790 |
| F | 0.8360730  | -4.9096120 | -1.8516570 |
| F | -0.6222780 | -3.5486150 | -0.1147090 |
| F | 1.0005170  | -1.7010090 | 1.3447760  |
| F | 0.8870900  | -2.6280160 | 3.8184240  |
| F | -3.6929890 | -1.0998260 | 1.3682300  |
| F | -3.7845850 | -2.0947640 | 3.8000560  |
| F | -1.5158390 | -2.8657070 | 5.0859140  |
| S | 2.4021240  | 1.3139480  | 1.7443780  |
| O | 3.4622250  | 2.1759000  | 2.2264560  |
| O | 1.3844130  | 0.8678720  | 2.6714050  |
| C | 3.1206970  | -0.0745850 | 0.9012520  |
| C | 2.8814500  | -0.3583210 | -0.4360160 |
| C | 3.8741520  | -0.9269320 | 1.7013840  |
| C | 3.4221120  | -1.5155900 | -0.9768000 |
| H | 2.2574880  | 0.2821550  | -1.0449720 |
| C | 4.3778780  | -2.0944970 | 1.1466960  |
| H | 4.0385230  | -0.7010630 | 2.7483450  |
| C | 4.1545130  | -2.4090940 | -0.1950920 |
| H | 3.2556360  | -1.7373570 | -2.0244840 |
| H | 4.9420910  | -2.7773420 | 1.7714860  |

|   |           |            |            |
|---|-----------|------------|------------|
| C | 4.6857180 | -3.6798780 | -0.8006260 |
| H | 4.8655750 | -4.4354180 | -0.0357880 |
| H | 3.9786050 | -4.0845580 | -1.5276400 |
| H | 5.6290700 | -3.4927360 | -1.3205170 |
| N | 1.5674090 | 2.2644120  | 0.5775490  |

7

M06 free energy in solution: -3562.478958 a.u.

| Symbol | X          | Y          | Z          |
|--------|------------|------------|------------|
| C      | 4.2155220  | -2.9466360 | -2.2442460 |
| C      | 3.6275110  | -1.7127990 | -2.4717760 |
| C      | 3.0682080  | -1.0075630 | -1.4073170 |
| C      | 3.0426890  | -1.5147590 | -0.1184890 |
| C      | 3.6397270  | -2.7547860 | 0.1034570  |
| C      | 4.2259470  | -3.4581770 | -0.9454620 |
| H      | 4.6500180  | -3.5114130 | -3.0608130 |
| H      | 2.5714660  | -0.9620180 | 0.6869890  |
| H      | 3.6310970  | -3.1790940 | 1.1009600  |
| H      | 4.6776450  | -4.4240650 | -0.7552400 |
| C      | -0.0312260 | -0.5083280 | -2.3441870 |
| N      | -0.7153200 | -0.2712370 | -1.4648990 |
| C      | 3.3807280  | -0.9462720 | -3.7482860 |
| H      | 3.1154990  | -1.5813110 | -4.5962690 |
| H      | 4.2472550  | -0.3376920 | -4.0186560 |
| C      | 2.2081710  | -0.0321460 | -3.3267470 |
| C      | 0.9034800  | -0.8886100 | -3.3866670 |
| H      | 1.1194630  | -1.9463060 | -3.2031540 |
| H      | 0.4200790  | -0.7979630 | -4.3609630 |
| C      | 2.0354500  | 1.2133170  | -4.1821650 |
| H      | 1.8210030  | 0.8920560  | -5.2035370 |
| H      | 1.2167880  | 1.8358010  | -3.8182530 |
| H      | 2.9441680  | 1.8140930  | -4.2009040 |
| B      | -1.5314960 | -0.1099460 | -0.1281580 |
| C      | -1.8376680 | 1.4605680  | 0.1348880  |
| C      | -1.4441580 | 2.5348650  | -0.6475160 |
| C      | -2.6413080 | 1.7742240  | 1.2247520  |
| C      | -1.8182440 | 3.8432420  | -0.3679290 |
| C      | -3.0328390 | 3.0603260  | 1.5397150  |
| C      | -2.6172380 | 4.1056240  | 0.7286000  |
| C      | -2.9445710 | -0.8834190 | -0.3814720 |
| C      | -3.5344550 | -1.7838780 | 0.4941760  |

|   |            |            |            |
|---|------------|------------|------------|
| C | -3.6755260 | -0.5959730 | -1.5274010 |
| C | -4.7612390 | -2.3801550 | 0.2426890  |
| C | -4.8998830 | -1.1718720 | -1.8170040 |
| C | -5.4450310 | -2.0760210 | -0.9210540 |
| C | -0.5643670 | -0.8410530 | 0.9682980  |
| C | -0.0564370 | -0.2702690 | 2.1259290  |
| C | -0.1877440 | -2.1634920 | 0.7516160  |
| C | 0.7570840  | -0.9614730 | 3.0153140  |
| C | 0.6262390  | -2.8837630 | 1.6048440  |
| C | 1.1130510  | -2.2693590 | 2.7470230  |
| F | -2.9403090 | -2.1173160 | 1.6446520  |
| F | -5.2880630 | -3.2408030 | 1.1101160  |
| F | -6.6180250 | -2.6435960 | -1.1761210 |
| F | -5.5522510 | -0.8682710 | -2.9369770 |
| F | -3.1934470 | 0.2875770  | -2.4162020 |
| F | -0.6262470 | -2.8031380 | -0.3435700 |
| F | 0.9773460  | -4.1362730 | 1.3261270  |
| F | 1.9296150  | -2.9255840 | 3.5648550  |
| F | 1.2097870  | -0.3665660 | 4.1181850  |
| F | -0.3218840 | 0.9999360  | 2.4553470  |
| F | -0.6711670 | 2.3622820  | -1.7279600 |
| F | -1.4176970 | 4.8426380  | -1.1492350 |
| F | -3.0418500 | 0.7883160  | 2.0399880  |
| F | -3.7940620 | 3.3076140  | 2.6025310  |
| F | -2.9836190 | 5.3513330  | 1.0075500  |
| S | 3.3575900  | 1.6335970  | -1.5034670 |
| O | 4.6534630  | 1.5414100  | -2.1603580 |
| O | 2.4888360  | 2.7581770  | -1.7800780 |
| C | 3.5792410  | 1.4785370  | 0.2398850  |
| C | 2.5166760  | 1.7979990  | 1.0765450  |
| C | 4.7863590  | 0.9944370  | 0.7285830  |
| C | 2.6768280  | 1.6164840  | 2.4435630  |
| H | 1.5906950  | 2.1858530  | 0.6647870  |
| C | 4.9188930  | 0.8075040  | 2.0962150  |
| H | 5.5913790  | 0.7602770  | 0.0426530  |
| C | 3.8659130  | 1.1010040  | 2.9680870  |
| H | 1.8637910  | 1.8678420  | 3.1132460  |
| H | 5.8511710  | 0.4233850  | 2.4952250  |
| C | 4.0109310  | 0.8473670  | 4.4436830  |
| H | 5.0002190  | 1.1442530  | 4.7949240  |
| H | 3.2557520  | 1.3878470  | 5.0135320  |

|   |           |            |            |
|---|-----------|------------|------------|
| H | 3.8855440 | -0.2184380 | 4.6529670  |
| N | 2.4426310 | 0.2156440  | -1.8554150 |

B(C<sub>6</sub>H<sub>5</sub>)<sub>3</sub>

M06 free energy in solution: -719.449133 a.u.

| Symbol | X          | Y          | Z          |
|--------|------------|------------|------------|
| B      | 0.0009000  | -0.0015900 | -0.0045500 |
| C      | 1.4714700  | -0.5371800 | -0.0042700 |
| C      | 1.8089700  | -1.7400400 | 0.6382800  |
| C      | 2.5044800  | 0.1684900  | -0.6430500 |
| C      | 3.1169700  | -2.2082500 | 0.6571500  |
| C      | 3.8089800  | -0.3093500 | -0.6537800 |
| C      | 4.1179200  | -1.4959100 | 0.0040000  |
| C      | -1.1989800 | -1.0057500 | -0.0030000 |
| C      | -2.4069700 | -0.6953000 | 0.6432600  |
| C      | -1.1092800 | -2.2514600 | -0.6459700 |
| C      | -3.4689700 | -1.5911900 | 0.6621900  |
| C      | -2.1782600 | -3.1390900 | -0.6572400 |
| C      | -3.3576100 | -2.8122100 | 0.0046200  |
| C      | -0.2704500 | 1.5398500  | -0.0026400 |
| C      | 0.6003500  | 2.4334000  | 0.6427200  |
| C      | -1.3959400 | 2.0818100  | -0.6453200 |
| C      | 0.3525200  | 3.8004400  | 0.6599300  |
| C      | -1.6332600 | 3.4506800  | -0.6581300 |
| C      | -0.7618800 | 4.3114200  | 0.0019200  |
| H      | -4.1889500 | -3.5079400 | 0.0076000  |
| H      | -2.0915200 | -4.0873000 | -1.1748100 |
| H      | -0.1896300 | -2.5193500 | -1.1558000 |
| H      | -4.3851600 | -1.3367800 | 1.1821500  |
| H      | -2.5063800 | 0.2592800  | 1.1495800  |
| H      | -2.0870300 | 1.4168000  | -1.1528900 |
| H      | -2.4993100 | 3.8471400  | -1.1751400 |
| H      | -0.9513500 | 5.3787300  | 0.0038400  |
| H      | 1.0297200  | 4.4686600  | 1.1790100  |
| H      | 1.4775400  | 2.0449500  | 1.1496700  |
| H      | 2.2745300  | 1.1001800  | -1.1494700 |
| H      | 4.5859800  | 0.2445000  | -1.1676400 |
| H      | 5.1371700  | -1.8648300 | 0.0077400  |
| H      | 3.3565500  | -3.1304900 | 1.1735400  |
| H      | 1.0328800  | -2.3076000 | 1.1412300  |

TS

(Lewis acid =B(C<sub>6</sub>H<sub>5</sub>)<sub>3</sub>)

M06 free energy in solution: -2073.756469 a.u.

| Symbol | X          | Y          | Z          |
|--------|------------|------------|------------|
| C      | -4.4601890 | 0.3618530  | 1.8263060  |
| C      | -3.6543190 | 0.2975880  | 0.6912430  |
| C      | -2.7780880 | -0.7881890 | 0.5523780  |
| C      | -2.7064330 | -1.7660460 | 1.5390610  |
| C      | -3.5321810 | -1.6955930 | 2.6506440  |
| C      | -4.4134210 | -0.6305450 | 2.7954310  |
| H      | -5.1366320 | 1.2014380  | 1.9433440  |
| H      | -1.9988770 | -2.5758090 | 1.4347470  |
| H      | -3.4741670 | -2.4660230 | 3.4091390  |
| H      | -5.0588790 | -0.5690040 | 3.6626450  |
| N      | -1.9491380 | -0.8288290 | -0.6159810 |
| C      | -1.0355130 | 0.2798150  | -0.7625150 |
| N      | 0.0248430  | 0.4021540  | -0.2063140 |
| C      | -3.7022920 | 1.4722580  | -0.2925700 |
| H      | -3.1831260 | 2.3212800  | 0.1645380  |
| H      | -4.7506610 | 1.7399310  | -0.4525110 |
| C      | -3.0702300 | 1.1575170  | -1.6078090 |
| C      | -1.7107400 | 1.4750650  | -1.7968610 |
| H      | -1.3510130 | 2.3878060  | -1.3239840 |
| H      | -1.3096370 | 1.2787710  | -2.7889490 |
| C      | -3.8583640 | 0.4011040  | -2.5972000 |
| H      | -4.5323000 | -0.3090820 | -2.1114890 |
| H      | -4.4885320 | 1.1401070  | -3.1158690 |
| H      | -3.2269220 | -0.0961190 | -3.3317170 |
| S      | -1.5774310 | -2.2219380 | -1.4933880 |
| O      | -2.6026590 | -3.1867690 | -1.1625170 |
| O      | -1.4026060 | -1.7320420 | -2.8488520 |
| C      | -0.0010970 | -2.7703350 | -0.9100300 |
| C      | 0.0848470  | -3.6771150 | 0.1414670  |
| C      | 1.1320840  | -2.1821180 | -1.4581940 |
| C      | 1.3356420  | -3.9519960 | 0.6777280  |
| H      | -0.8040690 | -4.1710120 | 0.5153210  |
| C      | 2.3708400  | -2.4611820 | -0.9038320 |
| H      | 1.0451780  | -1.5000370 | -2.2931110 |
| C      | 2.4853700  | -3.3231020 | 0.1887990  |
| H      | 1.4198300  | -4.6554690 | 1.4985770  |
| H      | 3.2503860  | -1.9702940 | -1.3083170 |

|   |            |            |            |
|---|------------|------------|------------|
| C | 3.8159580  | -3.5222710 | 0.8586260  |
| H | 4.6339430  | -3.4451480 | 0.1415430  |
| H | 3.9584100  | -2.7403130 | 1.6114000  |
| H | 3.8731480  | -4.4895420 | 1.3592150  |
| B | 1.2148110  | 1.3384480  | 0.2030100  |
| C | 2.4455260  | 0.9813870  | -0.8038790 |
| C | 2.2454550  | 0.8792090  | -2.1877800 |
| C | 3.7459530  | 0.7530460  | -0.3393900 |
| C | 3.2735240  | 0.5440680  | -3.0638880 |
| C | 4.7900880  | 0.4307980  | -1.2053080 |
| C | 4.5566600  | 0.3151210  | -2.5716440 |
| C | 0.6600640  | 2.8668700  | 0.0703850  |
| C | -0.3924690 | 3.2856600  | 0.9028670  |
| C | 1.0900880  | 3.7721970  | -0.9046560 |
| C | -0.9998230 | 4.5287910  | 0.7555460  |
| C | 0.4927690  | 5.0243570  | -1.0603190 |
| C | -0.5600600 | 5.4043340  | -0.2371190 |
| C | 1.5691950  | 0.9115620  | 1.7319590  |
| C | 1.4522790  | -0.4227010 | 2.1456150  |
| C | 2.0877410  | 1.8213660  | 2.6597130  |
| C | 1.8424680  | -0.8346240 | 3.4161690  |
| C | 2.4833430  | 1.4213240  | 3.9355500  |
| C | 2.3629290  | 0.0897580  | 4.3191070  |
| H | 1.2507670  | 1.0541010  | -2.5942520 |
| H | 3.0776840  | 0.4623080  | -4.1276430 |
| H | 5.3636780  | 0.0545990  | -3.2468560 |
| H | 5.7861060  | 0.2618860  | -0.8099130 |
| H | 3.9455430  | 0.8155590  | 0.7256050  |
| H | 1.9082050  | 3.4938380  | -1.5614100 |
| H | 0.8524970  | 5.7030470  | -1.8261680 |
| H | -1.0267070 | 6.3755690  | -0.3569800 |
| H | -1.8090690 | 4.8218040  | 1.4164230  |
| H | -0.7419830 | 2.6119540  | 1.6828720  |
| H | 2.1849560  | 2.8664400  | 2.3783740  |
| H | 2.8842090  | 2.1504700  | 4.6317560  |
| H | 2.6676690  | -0.2237680 | 5.3112010  |
| H | 1.0443310  | -1.1525680 | 1.4507180  |
| H | 1.7374440  | -1.8761200 | 3.7043130  |

---

Lewis Complex  
(Lewis acid=SnCl<sub>4</sub>)

---

M06 free energy in solution: -3198.728411 a.u.

| Symbol | X          | Y          | Z          |
|--------|------------|------------|------------|
| C      | 4.4162490  | -1.6311890 | 1.8770550  |
| C      | 3.5739730  | -1.3325240 | 0.8051190  |
| C      | 2.7334320  | -0.2283360 | 0.9636060  |
| C      | 2.7014270  | 0.5331570  | 2.1248180  |
| C      | 3.5558940  | 0.2146070  | 3.1690140  |
| C      | 4.4172800  | -0.8693150 | 3.0391180  |
| H      | 5.0834710  | -2.4812870 | 1.7912650  |
| H      | 2.0020300  | 1.3565210  | 2.2034480  |
| H      | 3.5435000  | 0.8039260  | 4.0767840  |
| H      | 5.0886920  | -1.1273430 | 3.8488290  |
| N      | 1.8417290  | 0.1508850  | -0.1146750 |
| C      | 0.8412440  | -0.6106980 | -0.4433180 |
| N      | -0.0801540 | -1.2547070 | -0.7345860 |
| C      | 3.5578520  | -2.2109640 | -0.4294400 |
| H      | 2.6431300  | -2.8137160 | -0.4355390 |
| H      | 4.3916190  | -2.9140760 | -0.3350150 |
| C      | 3.6860520  | -1.4797890 | -1.7500460 |
| C      | 2.8639900  | -1.7447820 | -2.7609370 |
| H      | 2.0596390  | -2.4666110 | -2.6632320 |
| H      | 2.9655740  | -1.2369450 | -3.7129150 |
| C      | 4.8103420  | -0.4868830 | -1.8504860 |
| H      | 4.7202140  | 0.2976470  | -1.0919750 |
| H      | 5.7711980  | -0.9820690 | -1.6749880 |
| H      | 4.8313970  | -0.0148610 | -2.8323880 |
| S      | 2.0041000  | 1.6903950  | -1.0067680 |
| O      | 3.1346670  | 2.3097430  | -0.3700880 |
| O      | 1.9775010  | 1.3351610  | -2.3987820 |
| C      | 0.4984090  | 2.4816560  | -0.5606860 |
| C      | 0.4602640  | 3.2656460  | 0.5872380  |
| C      | -0.6367650 | 2.2205930  | -1.3220440 |
| C      | -0.7610610 | 3.7884650  | 0.9841080  |
| H      | 1.3680290  | 3.4742900  | 1.1410520  |
| C      | -1.8469970 | 2.7476280  | -0.8971700 |
| H      | -0.5728850 | 1.6226560  | -2.2235170 |
| C      | -1.9291030 | 3.5197510  | 0.2649740  |
| H      | -0.8106760 | 4.4054570  | 1.8737660  |
| H      | -2.7441230 | 2.5404320  | -1.4700480 |
| C      | -3.2628120 | 4.0108700  | 0.7511620  |
| H      | -3.8963860 | 4.3180090  | -0.0816140 |

|    |            |            |            |
|----|------------|------------|------------|
| H  | -3.7765180 | 3.2017000  | 1.2791710  |
| H  | -3.1527550 | 4.8480130  | 1.4400410  |
| Sn | -2.2712090 | -1.1547880 | 0.0489380  |
| Cl | -4.4898120 | -0.9218610 | 0.7894470  |
| Cl | -2.6958790 | -0.5092100 | -2.1433980 |
| Cl | -1.9928140 | -3.3999590 | 0.5103790  |
| Cl | -1.3701240 | 0.3193530  | 1.6266020  |

TS

(Lewis acid=SnCl<sub>4</sub>)

M06 free energy in solution: -3198.676240 a.u.

| Symbol | X         | Y          | Z          |
|--------|-----------|------------|------------|
| C      | 4.3815460 | -0.9696720 | 2.0630110  |
| C      | 3.6228020 | -0.8943160 | 0.8954790  |
| C      | 2.6249200 | 0.0857930  | 0.8008730  |
| C      | 2.4174390 | 0.9715710  | 1.8548240  |
| C      | 3.1972680 | 0.8985320  | 2.9970150  |
| C      | 4.1794620 | -0.0795280 | 3.1067050  |
| H      | 5.1464760 | -1.7338730 | 2.1439910  |
| H      | 1.6239990 | 1.7014560  | 1.7777890  |
| H      | 3.0250750 | 1.5958840  | 3.8068240  |
| H      | 4.7873110 | -0.1481670 | 4.0000520  |
| N      | 1.8270220 | 0.2018800  | -0.3874440 |
| C      | 1.1937020 | -0.9602780 | -0.9475780 |
| N      | 0.0849290 | -1.4311710 | -0.8082850 |
| C      | 3.8865470 | -1.9373190 | -0.1940860 |
| H      | 3.3508870 | -2.8596380 | 0.0437130  |
| H      | 4.9613470 | -2.1395990 | -0.2103880 |
| C      | 3.4680410 | -1.4182400 | -1.5206730 |
| C      | 2.2019120 | -1.8039510 | -2.0266010 |
| H      | 1.9151260 | -2.8322080 | -1.8339100 |
| H      | 1.9470050 | -1.4316750 | -3.0158260 |
| C      | 4.2917970 | -0.3864140 | -2.1583170 |
| H      | 4.7474800 | 0.2844920  | -1.4246570 |
| H      | 5.1187110 | -0.9407360 | -2.6338750 |
| H      | 3.7569280 | 0.1598430  | -2.9321950 |
| S      | 1.6578440 | 1.6503490  | -1.2461450 |
| O      | 2.7191230 | 2.5157490  | -0.7854560 |
| O      | 1.5689520 | 1.2245840  | -2.6316420 |
| C      | 0.0914190 | 2.3023070  | -0.7660150 |
| C      | 0.0100550 | 3.2058930  | 0.2842030  |

|    |            |            |            |
|----|------------|------------|------------|
| C  | -1.0445450 | 1.8075170  | -1.4001810 |
| C  | -1.2471450 | 3.5846830  | 0.7366770  |
| H  | 0.9115390  | 3.6106020  | 0.7288020  |
| C  | -2.2902000 | 2.1929710  | -0.9260160 |
| H  | -0.9543950 | 1.1477400  | -2.2549170 |
| C  | -2.4086340 | 3.0646130  | 0.1630710  |
| H  | -1.3269580 | 4.2858630  | 1.5593050  |
| H  | -3.1834640 | 1.8036220  | -1.4026530 |
| C  | -3.7634640 | 3.4030580  | 0.7147090  |
| H  | -4.5000160 | 3.5019460  | -0.0836630 |
| H  | -4.0956770 | 2.5932350  | 1.3708230  |
| H  | -3.7393140 | 4.3269960  | 1.2925160  |
| Sn | -1.8088510 | -1.1507410 | 0.1308140  |
| Cl | -3.9307120 | -0.3716750 | 0.8896840  |
| Cl | -2.6179770 | -1.1593930 | -2.1018270 |
| Cl | -1.8906820 | -3.3482870 | 0.8944360  |
| Cl | -0.7453800 | 0.0843380  | 1.8535990  |

Lewis Complex

R<sup>1</sup>=Me R<sup>2</sup>=Me

M06 free energy in solution: -2782.956866 a.u.

| Symbol | X         | Y          | Z          |
|--------|-----------|------------|------------|
| C      | 5.4338610 | 1.6165150  | -0.5320170 |
| C      | 4.2954340 | 0.8349690  | -0.7298230 |
| C      | 3.5963010 | 1.0231530  | -1.9260270 |
| C      | 4.0103140 | 1.9353270  | -2.8889200 |
| C      | 5.1549540 | 2.6902570  | -2.6708520 |
| C      | 5.8643200 | 2.5304030  | -1.4862180 |
| H      | 5.9918890 | 1.4962030  | 0.3896880  |
| H      | 3.4280390 | 2.0519710  | -3.7955290 |
| H      | 5.4827420 | 3.4031210  | -3.4167370 |
| H      | 6.7549160 | 3.1186840  | -1.3022610 |
| N      | 2.4290540 | 0.2217910  | -2.2260130 |
| C      | 1.3794490 | 0.2605100  | -1.4642770 |
| N      | 0.4188370 | 0.2623900  | -0.8292200 |
| C      | 3.8628470 | -0.1764380 | 0.3103190  |
| H      | 2.8622150 | 0.0642550  | 0.6712480  |
| H      | 4.5337400 | -0.0788350 | 1.1697160  |
| C      | 3.9012060 | -1.6098940 | -0.1793700 |
| C      | 2.8309550 | -2.3973660 | -0.0967800 |
| H      | 1.8884340 | -2.0349100 | 0.3028290  |

|   |            |            |            |
|---|------------|------------|------------|
| H | 2.8639280  | -3.4319860 | -0.4208970 |
| C | 5.2223880  | -2.0778270 | -0.7239840 |
| H | 5.5189760  | -1.4866600 | -1.5967650 |
| H | 6.0099520  | -1.9457230 | 0.0247150  |
| H | 5.1859220  | -3.1292290 | -1.0093640 |
| B | -0.8438150 | 0.0516940  | 0.1043610  |
| C | -1.8686540 | -0.8839500 | -0.7518090 |
| C | -1.4230080 | -1.9517270 | -1.5198040 |
| C | -3.2469420 | -0.7188450 | -0.7203710 |
| C | -2.2611080 | -2.7857740 | -2.2365720 |
| C | -4.1238550 | -1.5360600 | -1.4186710 |
| C | -3.6280180 | -2.5727760 | -2.1870920 |
| C | -0.2432680 | -0.6951390 | 1.4244160  |
| C | 0.7906410  | -0.0785430 | 2.1198700  |
| C | -0.5846880 | -1.9603270 | 1.8788300  |
| C | 1.4865180  | -0.6702210 | 3.1550070  |
| C | 0.0780650  | -2.5874120 | 2.9283090  |
| C | 1.1234110  | -1.9445180 | 3.5634390  |
| C | -1.4367310 | 1.5443610  | 0.3596150  |
| C | -1.6903770 | 2.3651630  | -0.7315590 |
| C | -1.7562420 | 2.0836880  | 1.5962090  |
| C | -2.2157990 | 3.6405290  | -0.6228070 |
| C | -2.2849510 | 3.3569430  | 1.7490350  |
| C | -2.5147080 | 4.1404740  | 0.6329470  |
| F | 1.1744950  | 1.1588090  | 1.7588100  |
| F | 2.4998470  | -0.0426120 | 3.7479430  |
| F | 1.7721110  | -2.5360740 | 4.5587520  |
| F | -0.2826820 | -3.8063690 | 3.3211150  |
| F | -1.5779090 | -2.6617250 | 1.3206050  |
| F | -1.5786090 | 1.3809590  | 2.7216110  |
| F | -2.5743710 | 3.8304890  | 2.9591580  |
| F | -3.0213790 | 5.3617300  | 0.7636940  |
| F | -2.4390810 | 4.3839600  | -1.7049230 |
| F | -1.4439320 | 1.9185890  | -1.9738370 |
| F | -0.1096110 | -2.2516700 | -1.5665280 |
| F | -1.7698500 | -3.7909110 | -2.9590630 |
| F | -3.8101850 | 0.2383810  | 0.0262850  |
| F | -5.4370460 | -1.3351740 | -1.3481120 |
| F | -4.4542640 | -3.3649230 | -2.8601000 |
| C | 2.5181900  | -0.8346010 | -3.2558890 |
| H | 1.5954620  | -1.4117510 | -3.2471400 |

|   |           |            |            |
|---|-----------|------------|------------|
| H | 2.6603950 | -0.3715780 | -4.2314450 |
| H | 3.3563990 | -1.4876770 | -3.0128470 |

---

TS

R<sup>1</sup>=Me R<sup>2</sup>=Me

M06 free energy in solution: -2782.894319 a.u.

| Symbol | X          | Y          | Z          |
|--------|------------|------------|------------|
| C      | 5.5496200  | -0.2819680 | -0.1717620 |
| C      | 4.3831840  | -0.9782880 | -0.4752260 |
| C      | 3.6703950  | -0.6592070 | -1.6455490 |
| C      | 4.1631080  | 0.3509600  | -2.4742770 |
| C      | 5.3369110  | 1.0238960  | -2.1642080 |
| C      | 6.0377140  | 0.7120680  | -1.0079770 |
| H      | 6.0862400  | -0.5351420 | 0.7362820  |
| H      | 3.6197450  | 0.6327710  | -3.3645100 |
| H      | 5.6926380  | 1.8023500  | -2.8277360 |
| H      | 6.9536020  | 1.2322200  | -0.7582850 |
| N      | 2.4844290  | -1.3879580 | -2.0095490 |
| C      | 1.4478070  | -1.3149520 | -1.0190450 |
| N      | 0.5421230  | -0.5201110 | -0.9638180 |
| C      | 3.9167190  | -2.0227660 | 0.5418790  |
| H      | 3.4765590  | -1.5012940 | 1.3965590  |
| H      | 4.7887220  | -2.5922710 | 0.8741700  |
| C      | 2.9193030  | -2.9421270 | -0.0611590 |
| C      | 1.5551240  | -2.6251760 | 0.0724240  |
| H      | 1.2525010  | -2.1806910 | 1.0156930  |
| H      | 0.8480060  | -3.3546900 | -0.3136390 |
| C      | 3.4085260  | -4.0609980 | -0.8837490 |
| H      | 4.2924530  | -3.7703170 | -1.4561100 |
| H      | 3.7287860  | -4.8433320 | -0.1782080 |
| H      | 2.6362800  | -4.4737540 | -1.5291980 |
| B      | -0.6287160 | 0.0547110  | -0.1626140 |
| C      | -0.5130370 | -0.3366300 | 1.4410430  |
| C      | 0.6909630  | -0.1154160 | 2.0999780  |
| C      | -1.5438540 | -0.7905560 | 2.2531450  |
| C      | 0.8946090  | -0.3576500 | 3.4476210  |
| C      | -1.3883890 | -1.0353990 | 3.6109410  |
| C      | -0.1611550 | -0.8221720 | 4.2129460  |
| C      | -0.5263380 | 1.6895850  | -0.1878880 |
| C      | 0.5271470  | 2.4436100  | -0.6828110 |
| C      | -1.5392640 | 2.4172660  | 0.4250650  |

|   |            |            |            |   |            |            |            |
|---|------------|------------|------------|---|------------|------------|------------|
| C | 0.5658430  | 3.8299680  | -0.5892480 | H | 5.2293190  | -0.6861510 | -4.4196180 |
| C | -1.5427130 | 3.7942050  | 0.5332870  | H | 6.2726200  | 1.3422190  | -3.4451090 |
| C | -0.4721940 | 4.5083410  | 0.0189770  | C | 1.5710980  | -0.9292840 | -0.4679500 |
| C | -1.9647900 | -0.5494070 | -0.8936710 | N | 0.5255180  | -0.4776910 | -0.3347300 |
| C | -2.2104570 | -1.9129810 | -0.8083280 | C | 3.9885260  | 0.8787200  | 0.6126660  |
| C | -2.8733670 | 0.1568390  | -1.6677140 | H | 2.9182420  | 1.0695870  | 0.7321300  |
| C | -3.2835130 | -2.5493280 | -1.4015940 | H | 4.5004510  | 1.8256960  | 0.8095880  |
| C | -3.9683890 | -0.4388360 | -2.2814070 | C | 4.4522030  | -0.1443650 | 1.6331510  |
| C | -4.1772060 | -1.7978570 | -2.1464500 | C | 3.6400640  | -0.5745340 | 2.5971510  |
| F | 1.5881650  | 1.8796040  | -1.2798340 | H | 2.6234390  | -0.2064210 | 2.6862130  |
| F | 1.6023300  | 4.5119590  | -1.0790700 | H | 3.9863560  | -1.2766620 | 3.3481970  |
| F | -0.4440900 | 5.8351850  | 0.1138800  | C | 5.8769890  | -0.6056280 | 1.5037750  |
| F | -2.5512900 | 4.4392020  | 1.1181100  | H | 6.0219690  | -1.1577570 | 0.5707670  |
| F | -2.5955280 | 1.7615660  | 0.9313340  | H | 6.5535330  | 0.2547090  | 1.4801760  |
| F | -2.7409440 | 1.4720070  | -1.8773290 | H | 6.1584900  | -1.2517910 | 2.3349190  |
| F | -4.8149700 | 0.2882960  | -3.0086900 | B | -0.9408970 | 0.0589390  | -0.1090840 |
| F | -5.2201560 | -2.3799070 | -2.7305140 | C | -1.2017510 | -0.1542640 | 1.4899460  |
| F | -3.4647670 | -3.8632140 | -1.2679340 | C | -0.2832170 | 0.3759850  | 2.3873960  |
| F | -1.3748810 | -2.6914570 | -0.0911560 | C | -2.2926460 | -0.7895650 | 2.0654130  |
| F | 1.7602820  | 0.3272040  | 1.4087460  | C | -0.3911240 | 0.2566960  | 3.7611970  |
| F | 2.0902980  | -0.1595170 | 4.0046370  | C | -2.4458900 | -0.9222520 | 3.4382820  |
| F | -2.7647630 | -1.0193980 | 1.7587910  | C | -1.4870890 | -0.4036170 | 4.2909570  |
| F | -2.4094320 | -1.4769340 | 4.3418540  | C | -0.9754560 | 1.6516160  | -0.4160100 |
| F | 0.0031240  | -1.0608280 | 5.5098650  | C | 0.0721750  | 2.4500960  | -0.8432210 |
| C | 1.9560850  | -1.1379170 | -3.3552400 | C | -2.1675560 | 2.3166820  | -0.1557500 |
| H | 1.1286600  | -1.8267080 | -3.5213620 | C | -0.0483790 | 3.8225920  | -1.0124400 |
| H | 1.5907860  | -0.1152860 | -3.4809990 | C | -2.3318470 | 3.6789190  | -0.3136400 |
| H | 2.7420090  | -1.3475090 | -4.0802240 | C | -1.2562950 | 4.4391720  | -0.7467770 |

---

Lewis Complex

R<sup>1</sup>=Ac R<sup>2</sup>=Me

M06 free energy in solution: -2896.285476 a.u.

---

| Symbol | X          | Y          | Z          |
|--------|------------|------------|------------|
| C      | 5.2245700  | 1.1808830  | -1.5821890 |
| C      | 4.3064510  | 0.4714580  | -0.8092580 |
| C      | 3.7315580  | -0.6561350 | -1.3958990 |
| C      | 4.0438570  | -1.0841660 | -2.6770250 |
| C      | 4.9698240  | -0.3638060 | -3.4194890 |
| C      | 5.5539520  | 0.7718890  | -2.8694390 |
| H      | 5.6887550  | 2.0650950  | -1.1605000 |
| H      | 3.5686610  | -1.9718500 | -3.0761030 |
| C      | -1.8563670 | -0.8680420 | -1.0867890 |
| C      | -1.8169660 | -2.2472650 | -0.9171620 |
| C      | -2.6548870 | -0.4280170 | -2.1321450 |
| C      | -2.5120230 | -3.1444240 | -1.7030220 |
| C      | -3.3764610 | -1.2946440 | -2.9441860 |
| C      | -3.3043940 | -2.6577960 | -2.7306310 |
| F      | 1.2820320  | 1.9290930  | -1.1127290 |
| F      | 0.9889410  | 4.5470080  | -1.4271160 |
| F      | -1.3875150 | 5.7510330  | -0.9056030 |
| F      | -3.4982550 | 4.2651700  | -0.0589400 |
| F      | -3.2295280 | 1.6079450  | 0.2501010  |
| F      | -2.7686290 | 0.8711550  | -2.4265690 |
| F      | -4.1275430 | -0.8210660 | -3.9347850 |



|   |            |            |            |
|---|------------|------------|------------|
| F | -3.9801230 | -3.4961490 | -3.5065740 |
| F | -2.4269560 | -4.4552800 | -1.4888760 |
| F | -1.0664180 | -2.7664390 | 0.0735170  |
| F | 0.7862300  | 1.0499510  | 1.9232970  |
| F | 0.5400590  | 0.7638680  | 4.5658540  |
| F | -3.2638330 | -1.3093060 | 1.3100230  |
| F | -3.5059850 | -1.5473150 | 3.9425880  |
| F | -1.6197530 | -0.5325790 | 5.6051740  |
| N | 2.7698560  | -1.4333170 | -0.6281470 |
| C | 3.1749140  | -2.6372760 | 0.0809750  |
| C | 2.0988740  | -3.2529750 | 0.9216360  |
| H | 1.7438520  | -2.5346460 | 1.6648450  |
| H | 1.2495500  | -3.5469880 | 0.3007960  |
| H | 2.5145950  | -4.1246060 | 1.4193120  |
| O | 4.2857870  | -3.0314750 | -0.0751810 |

TS

R<sup>1</sup>=Ac R<sup>2</sup>=Me

M06 free energy in solution: -2896.229401 a.u.

| Symbol | X         | Y          | Z          |
|--------|-----------|------------|------------|
| C      | 5.3860700 | 0.9378610  | 0.0487690  |
| C      | 4.3831290 | 0.0013900  | 0.2991000  |
| C      | 3.8236250 | -0.6919160 | -0.7808800 |
| C      | 4.2686420 | -0.4471350 | -2.0783430 |
| C      | 5.2766340 | 0.4749860  | -2.3061390 |
| C      | 5.8361750 | 1.1734940  | -1.2406000 |
| H      | 5.8156460 | 1.4832820  | 0.8816900  |
| H      | 3.8164210 | -0.9882860 | -2.8980590 |
| H      | 5.6163940 | 0.6570330  | -3.3178600 |
| H      | 6.6202000 | 1.9002190  | -1.4128460 |
| C      | 1.6192870 | -1.1470490 | 0.1332220  |
| N      | 0.6571420 | -0.6030850 | -0.3505190 |
| C      | 3.9100190 | -0.1593190 | 1.7478250  |
| H      | 3.2706280 | 0.6878350  | 2.0086650  |
| H      | 4.7932370 | -0.1587050 | 2.3929460  |
| C      | 3.1723920 | -1.4370780 | 1.9218330  |
| C      | 1.7669850 | -1.4287040 | 1.8291180  |
| H      | 1.2598480 | -0.5666440 | 2.2488900  |
| H      | 1.2628590 | -2.3707150 | 2.0273300  |
| C      | 3.9498900 | -2.6854910 | 1.9952210  |
| H      | 4.8180850 | -2.6538330 | 1.3310590  |

|   |            |            |            |
|---|------------|------------|------------|
| H | 4.3407380  | -2.7445400 | 3.0226060  |
| H | 3.3434950  | -3.5712050 | 1.8120830  |
| B | -0.7106890 | 0.0491590  | -0.1019450 |
| C | -0.8562960 | 0.6280290  | 1.4346040  |
| C | 0.1332170  | 1.4792300  | 1.9112120  |
| C | -1.9319650 | 0.4427160  | 2.2904130  |
| C | 0.1040070  | 2.0817540  | 3.1558130  |
| C | -2.0109690 | 1.0380350  | 3.5428960  |
| C | -0.9860460 | 1.8580480  | 3.9807640  |
| C | -0.8574680 | 1.3715130  | -1.0477190 |
| C | 0.1594160  | 1.9822870  | -1.7647780 |
| C | -2.0798810 | 2.0306390  | -1.0631660 |
| C | -0.0313050 | 3.1599200  | -2.4775070 |
| C | -2.3119980 | 3.2003750  | -1.7600910 |
| C | -1.2710620 | 3.7694650  | -2.4775420 |
| C | -1.7363480 | -1.1761520 | -0.4701690 |
| C | -1.7368950 | -2.3075420 | 0.3350650  |
| C | -2.5450780 | -1.2653000 | -1.5940610 |
| C | -2.4840760 | -3.4422430 | 0.0865360  |
| C | -3.3214190 | -2.3818110 | -1.8811670 |
| C | -3.2922590 | -3.4762740 | -1.0381910 |
| F | 1.3988560  | 1.4742170  | -1.7977110 |
| F | 0.9753390  | 3.7100200  | -3.1569640 |
| F | -1.4644530 | 4.8973540  | -3.1557260 |
| F | -3.5091860 | 3.7843740  | -1.7517970 |
| F | -3.1070840 | 1.5084110  | -0.3751510 |
| F | -2.6162200 | -0.2714460 | -2.4852910 |
| F | -4.0848580 | -2.4104790 | -2.9711450 |
| F | -4.0219090 | -4.5536510 | -1.3055990 |
| F | -2.4256840 | -4.4951610 | 0.9012290  |
| F | -0.9574100 | -2.3360690 | 1.4367410  |
| F | 1.2220610  | 1.7179720  | 1.1512710  |
| F | 1.1077130  | 2.8566940  | 3.5666220  |
| F | -2.9649840 | -0.3297450 | 1.9412600  |
| F | -3.0637150 | 0.8278370  | 4.3288080  |
| F | -1.0436520 | 2.4247110  | 5.1808160  |
| N | 2.7613800  | -1.6361320 | -0.5690630 |
| C | 2.7259230  | -2.8823900 | -1.2002590 |
| C | 1.4233420  | -3.6358810 | -1.0625680 |
| H | 1.0797430  | -3.6877640 | -0.0259510 |
| H | 0.6459710  | -3.1239780 | -1.6357280 |

|   |           |            |            |
|---|-----------|------------|------------|
| H | 1.5715620 | -4.6387400 | -1.4534920 |
| O | 3.6814390 | -3.3041670 | -1.8020110 |

Lewis Complex  
R<sup>1</sup>=AcCl R<sup>2</sup>=Me

M06 free energy in solution: -3316.604309 a.u.

| Symbol | X          | Y          | Z          |
|--------|------------|------------|------------|
| C      | -4.4713750 | -1.4656670 | 0.2581450  |
| C      | -3.6504950 | -0.4726320 | -0.2724140 |
| C      | -3.1053620 | -0.7268620 | -1.5324980 |
| C      | -3.3413200 | -1.8881980 | -2.2485300 |
| C      | -4.1714310 | -2.8540710 | -1.6952040 |
| C      | -4.7262480 | -2.6420060 | -0.4384660 |
| H      | -4.9098130 | -1.3130930 | 1.2382550  |
| H      | -2.8772000 | -2.0280020 | -3.2171550 |
| H      | -4.3716550 | -3.7689730 | -2.2373960 |
| H      | -5.3609850 | -3.3984310 | 0.0060890  |
| C      | -0.9895010 | 0.2708980  | -1.5318480 |
| N      | -0.0232730 | 0.1434230  | -0.9316910 |
| C      | -3.4117130 | 0.8316760  | 0.4586150  |
| H      | -2.3439460 | 0.9945270  | 0.6430740  |
| H      | -3.8901030 | 0.7527020  | 1.4402550  |
| C      | -3.9959220 | 2.0213630  | -0.2815080 |
| C      | -3.2612520 | 3.0992150  | -0.5476700 |
| H      | -2.2220030 | 3.1718320  | -0.2467770 |
| H      | -3.6932560 | 3.9541180  | -1.0567670 |
| C      | -5.4410420 | 1.9020140  | -0.6787990 |
| H      | -5.5751140 | 1.1168840  | -1.4292180 |
| H      | -6.0548610 | 1.6298450  | 0.1857310  |
| H      | -5.8127510 | 2.8391560  | -1.0924240 |
| B      | 1.0679240  | -0.1135880 | 0.2209780  |
| C      | 1.8370220  | 1.3070490  | 0.3833790  |
| C      | 1.0970160  | 2.4714760  | 0.5417140  |
| C      | 3.2129460  | 1.4818180  | 0.3627640  |
| C      | 1.6509000  | 3.7314480  | 0.6509010  |
| C      | 3.8137430  | 2.7292330  | 0.4724190  |
| C      | 3.0302200  | 3.8593430  | 0.6119950  |
| C      | 0.0965740  | -0.5204550 | 1.4693960  |
| C      | -0.8366180 | -1.5414940 | 1.3092840  |
| C      | 0.0743210  | 0.1128740  | 2.7037420  |
| C      | -1.7417930 | -1.9127460 | 2.2856350  |

|    |            |            |            |
|----|------------|------------|------------|
| C  | -0.8274870 | -0.2205710 | 3.7058980  |
| C  | -1.7436350 | -1.2337550 | 3.4937400  |
| C  | 1.9932630  | -1.3177070 | -0.3400260 |
| C  | 2.5611300  | -1.2005730 | -1.6022820 |
| C  | 2.2934730  | -2.4840690 | 0.3458340  |
| C  | 3.3702790  | -2.1667060 | -2.1684270 |
| C  | 3.1013370  | -3.4795020 | -0.1861180 |
| C  | 3.6392230  | -3.3207840 | -1.4500580 |
| F  | -0.8794840 | -2.2269180 | 0.1550440  |
| F  | -2.6018940 | -2.9082470 | 2.0851860  |
| F  | -2.6118370 | -1.5646090 | 4.4418390  |
| F  | -0.8130310 | 0.4218710  | 4.8699090  |
| F  | 0.9375560  | 1.0897100  | 2.9978000  |
| F  | 1.8169340  | -2.7038870 | 1.5769250  |
| F  | 3.3596410  | -4.5852430 | 0.5077070  |
| F  | 4.4115220  | -4.2660490 | -1.9721550 |
| F  | 3.8941170  | -2.0015770 | -3.3804170 |
| F  | 2.3481740  | -0.0835780 | -2.3156920 |
| F  | -0.2448980 | 2.3906040  | 0.6282680  |
| F  | 0.8835800  | 4.8081530  | 0.7979900  |
| F  | 4.0435160  | 0.4411840  | 0.2414500  |
| F  | 5.1383070  | 2.8438820  | 0.4414340  |
| F  | 3.5925020  | 5.0570500  | 0.7119410  |
| N  | -2.1814130 | 0.2538250  | -2.0993180 |
| C  | -2.6202140 | 1.2099580  | -3.0379650 |
| O  | -3.6974070 | 1.2042190  | -3.5081330 |
| Cl | -1.3708500 | 2.3710810  | -3.4347870 |

TS

R<sup>1</sup>=AcCl R<sup>2</sup>=Me

M06 free energy in solution: -3316.556485 a.u.

| Symbol | X         | Y          | Z          |
|--------|-----------|------------|------------|
| C      | 5.1509210 | 1.1254090  | 0.1968510  |
| C      | 4.2183950 | 0.0972770  | 0.3337840  |
| C      | 3.7079520 | -0.4857600 | -0.8313190 |
| C      | 4.1204000 | -0.0639760 | -2.0903820 |
| C      | 5.0589970 | 0.9485070  | -2.2020910 |
| C      | 5.5714250 | 1.5475300  | -1.0554310 |
| H      | 5.5494850 | 1.5946240  | 1.0893660  |
| H      | 3.6916250 | -0.5294570 | -2.9683280 |
| H      | 5.3790640 | 1.2784800  | -3.1819570 |

|   |            |            |            |
|---|------------|------------|------------|
| H | 6.2996900  | 2.3446910  | -1.1370080 |
| C | 1.5362270  | -1.1862070 | 0.0051780  |
| N | 0.5841900  | -0.5745000 | -0.3915620 |
| C | 3.7750010  | -0.2766660 | 1.7525340  |
| H | 3.1117300  | 0.5055590  | 2.1284940  |
| H | 4.6685410  | -0.3200240 | 2.3820140  |
| C | 3.0917640  | -1.6003420 | 1.7794590  |
| C | 1.6941470  | -1.6593370 | 1.6938420  |
| H | 1.1325000  | -0.8612980 | 2.1692740  |
| H | 1.2307520  | -2.6392070 | 1.7641320  |
| C | 3.9363520  | -2.8068330 | 1.6872470  |
| H | 4.7773930  | -2.6541620 | 1.0038210  |
| H | 4.3729210  | -2.9553160 | 2.6859660  |
| H | 3.3719110  | -3.7016630 | 1.4288760  |
| B | -0.7608790 | 0.1114480  | -0.0995070 |
| C | -0.8325570 | 0.6247250  | 1.4647990  |
| C | 0.2211790  | 1.3890710  | 1.9493800  |
| C | -1.8900620 | 0.4577760  | 2.3473260  |
| C | 0.2723410  | 1.9196010  | 3.2256980  |
| C | -1.8899630 | 0.9871320  | 3.6314500  |
| C | -0.8014030 | 1.7164100  | 4.0765560  |
| C | -0.8667600 | 1.4777080  | -0.9865320 |
| C | 0.1637240  | 2.0795020  | -1.6920220 |
| C | -2.0636390 | 2.1819660  | -0.9601160 |
| C | 0.0081460  | 3.2885920  | -2.3587640 |
| C | -2.2618460 | 3.3828400  | -1.6135490 |
| C | -1.2095530 | 3.9404140  | -2.3232570 |
| C | -1.8427540 | -1.0534650 | -0.4825990 |
| C | -1.8871360 | -2.2005610 | 0.2984800  |
| C | -2.6892150 | -1.0631870 | -1.5817140 |
| C | -2.7187530 | -3.2756700 | 0.0534630  |
| C | -3.5469450 | -2.1183660 | -1.8641050 |
| C | -3.5636940 | -3.2297420 | -1.0429960 |
| F | 1.3860340  | 1.5313160  | -1.7574880 |
| F | 1.0275810  | 3.8278090  | -3.0278780 |
| F | -1.3699720 | 5.0975020  | -2.9589600 |
| F | -3.4376530 | 4.0066320  | -1.5705340 |
| F | -3.0996180 | 1.6753360  | -0.2746090 |
| F | -2.7216490 | -0.0444040 | -2.4473830 |
| F | -4.3472160 | -2.0716750 | -2.9269540 |
| F | -4.3757960 | -4.2477520 | -1.3055880 |

|    |            |            |            |
|----|------------|------------|------------|
| F  | -2.7140160 | -4.3443280 | 0.8491260  |
| F  | -1.0824750 | -2.2970650 | 1.3763460  |
| F  | 1.2914020  | 1.6144410  | 1.1598270  |
| F  | 1.3373110  | 2.6065430  | 3.6397130  |
| F  | -2.9799110 | -0.2294440 | 1.9959580  |
| F  | -2.9281820 | 0.7998370  | 4.4415340  |
| F  | -0.7870530 | 2.2206700  | 5.3051680  |
| N  | 2.7078540  | -1.5223570 | -0.7382290 |
| C  | 2.8913030  | -2.7324430 | -1.3419220 |
| O  | 3.8399450  | -3.0843970 | -1.9579180 |
| Cl | 1.5024630  | -3.8262620 | -1.0703060 |

---

Lewis Complex

R<sup>1</sup>=Ts R<sup>2</sup>=H

M06 free energy in solution: -3523.159320 a.u.

| Symbol | X          | Y          | Z          |
|--------|------------|------------|------------|
| C      | -5.7060190 | 0.6512970  | 0.5127940  |
| C      | -4.5059950 | 0.1585100  | -0.0055950 |
| C      | -3.8775150 | -0.8496470 | 0.7332820  |
| C      | -4.3966050 | -1.3369960 | 1.9288420  |
| C      | -5.5958500 | -0.8331310 | 2.4067340  |
| C      | -6.2509760 | 0.1639670  | 1.6928420  |
| H      | -6.2182500 | 1.4373350  | -0.0302380 |
| H      | -3.8637570 | -2.1117130 | 2.4635100  |
| H      | -6.0092190 | -1.2134840 | 3.3319620  |
| H      | -7.1873830 | 0.5675540  | 2.0583630  |
| N      | -2.6195590 | -1.4231800 | 0.2834920  |
| C      | -1.5611670 | -0.6760700 | 0.1378630  |
| N      | -0.5977540 | -0.0587930 | 0.0552870  |
| C      | -3.9334990 | 0.7714880  | -1.2676180 |
| H      | -3.1332530 | 1.4688260  | -0.9978940 |
| H      | -4.7261240 | 1.3803600  | -1.7126020 |
| C      | -3.4282570 | -0.1976250 | -2.3032990 |
| C      | -2.2734670 | -0.0538460 | -2.9408140 |
| H      | -1.6011880 | 0.7717550  | -2.7203510 |
| H      | -1.9527950 | -0.7599840 | -3.6968580 |
| S      | -2.5141440 | -3.1258770 | -0.2511470 |
| O      | -3.4266700 | -3.7862770 | 0.6445400  |
| O      | -2.6999170 | -3.1829790 | -1.6755120 |
| C      | -0.8284790 | -3.4397700 | 0.1515680  |
| C      | -0.3920260 | -3.2175230 | 1.4568140  |

|   |            |            |            |
|---|------------|------------|------------|
| C | 0.0126320  | -3.9214240 | -0.8429120 |
| C | 0.9348450  | -3.4682320 | 1.7557550  |
| H | -1.0668280 | -2.8323510 | 2.2132790  |
| C | 1.3303290  | -4.2061430 | -0.5036190 |
| H | -0.3552900 | -4.0648660 | -1.8515840 |
| C | 1.8106660  | -3.9747080 | 0.7854990  |
| H | 1.3012070  | -3.2781700 | 2.7582880  |
| H | 1.9993550  | -4.5965310 | -1.2632700 |
| C | 3.2380600  | -4.2783770 | 1.1482580  |
| H | 3.8539090  | -4.4344950 | 0.2614590  |
| H | 3.6725590  | -3.4660070 | 1.7342710  |
| H | 3.2835440  | -5.1859520 | 1.7558910  |
| B | 0.7367250  | 0.7690510  | -0.0035030 |
| C | 0.3935220  | 1.9739950  | -1.0509420 |
| C | -0.7375060 | 2.7424190  | -0.8073950 |
| C | 1.0962740  | 2.2995640  | -2.2012670 |
| C | -1.1879900 | 3.7385100  | -1.6548050 |
| C | 0.6855930  | 3.2976810  | -3.0738680 |
| C | -0.4662150 | 4.0162590  | -2.8036030 |
| C | 1.0315110  | 1.3760570  | 1.4740820  |
| C | 0.4567610  | 0.9646470  | 2.6660610  |
| C | 1.9582940  | 2.4053620  | 1.5839430  |
| C | 0.7539920  | 1.5501460  | 3.8884580  |
| C | 2.2855650  | 3.0139120  | 2.7811240  |
| C | 1.6696190  | 2.5839180  | 3.9454790  |
| C | 1.8532670  | -0.3008920 | -0.5181720 |
| C | 1.6308390  | -0.9967800 | -1.7006640 |
| C | 3.0407550  | -0.6093690 | 0.1330780  |
| C | 2.5048040  | -1.9317460 | -2.2191320 |
| C | 3.9518640  | -1.5326160 | -0.3627850 |
| C | 3.6776100  | -2.2043810 | -1.5375860 |
| F | -0.4238870 | -0.0525240 | 2.7056930  |
| F | 0.1681790  | 1.1203910  | 5.0047680  |
| F | 1.9677550  | 3.1514760  | 5.1086700  |
| F | 3.1872730  | 3.9904710  | 2.8305520  |
| F | 2.6188550  | 2.8124960  | 0.4917210  |
| F | 3.3774660  | -0.0354870 | 1.2929350  |
| F | 5.0647660  | -1.8127300 | 0.3130320  |
| F | 4.4982920  | -3.1555000 | -1.9742390 |
| F | 2.1985540  | -2.6236820 | -3.3149010 |
| F | 0.5035440  | -0.7778630 | -2.3930010 |

|   |            |            |            |
|---|------------|------------|------------|
| F | -1.4755980 | 2.5066370  | 0.2928840  |
| F | -2.3020700 | 4.4142910  | -1.3836660 |
| F | 2.2217990  | 1.6551260  | -2.5246540 |
| F | 1.3885720  | 3.5702010  | -4.1694920 |
| F | -0.8712570 | 4.9685680  | -3.6346330 |
| H | -4.0715330 | -1.0431920 | -2.5334430 |

---

TS

R<sup>1</sup>=Ts R<sup>2</sup>=H

M06 free energy in solution: -3523.096467 a.u.

| Symbol | X          | Y          | Z          |
|--------|------------|------------|------------|
| C      | -4.9660740 | -2.3501300 | 0.1091640  |
| C      | -3.7241040 | -2.3249050 | -0.5167360 |
| C      | -2.6008890 | -2.7804180 | 0.1855260  |
| C      | -2.7280630 | -3.2762780 | 1.4780200  |
| C      | -3.9777330 | -3.3212820 | 2.0778300  |
| C      | -5.0956310 | -2.8505730 | 1.3979080  |
| H      | -5.8371610 | -1.9860000 | -0.4238580 |
| H      | -1.8503290 | -3.6335360 | 1.9994140  |
| H      | -4.0749540 | -3.7137050 | 3.0819490  |
| H      | -6.0709710 | -2.8792940 | 1.8671930  |
| N      | -1.3254720 | -2.6944350 | -0.4673690 |
| C      | -0.8876470 | -1.3915660 | -0.9020490 |
| N      | -0.3819740 | -0.5749690 | -0.1702130 |
| C      | -3.6247430 | -1.7245450 | -1.9276130 |
| H      | -3.7540570 | -0.6412850 | -1.8557950 |
| H      | -4.4295240 | -2.1528980 | -2.5321700 |
| C      | -2.3286650 | -2.0477020 | -2.5555740 |
| C      | -1.2332710 | -1.1570650 | -2.5318960 |
| H      | -1.4596840 | -0.0964530 | -2.6011630 |
| H      | -0.3538050 | -1.4669530 | -3.0890520 |
| S      | -0.2486820 | -3.9696940 | -0.6947820 |
| O      | -0.7877260 | -5.0845370 | 0.0493370  |
| O      | -0.0340560 | -4.0849860 | -2.1277460 |
| C      | 1.2497980  | -3.3485680 | 0.0161480  |
| C      | 1.2345350  | -2.8118350 | 1.2998150  |
| C      | 2.4142680  | -3.4148690 | -0.7382700 |
| C      | 2.4254270  | -2.3578340 | 1.8417330  |
| H      | 0.3051280  | -2.7052880 | 1.8475890  |
| C      | 3.5989280  | -2.9607840 | -0.1716030 |
| H      | 2.3873790  | -3.8068580 | -1.7470740 |

|   |            |            |            |
|---|------------|------------|------------|
| C | 3.6242140  | -2.4421620 | 1.1237370  |
| H | 2.4270850  | -1.9210840 | 2.8342000  |
| H | 4.5168320  | -3.0055100 | -0.7485480 |
| C | 4.9199370  | -2.0050110 | 1.7503400  |
| H | 5.6204820  | -1.6289200 | 1.0023920  |
| H | 4.7570970  | -1.2255790 | 2.4953970  |
| H | 5.3937890  | -2.8538020 | 2.2510330  |
| B | 0.1334470  | 0.8613880  | -0.0109400 |
| C | -0.5782990 | 1.8544470  | -1.1164130 |
| C | -1.9640010 | 1.8381240  | -1.2163380 |
| C | 0.0572740  | 2.7741390  | -1.9381160 |
| C | -2.6874930 | 2.6331950  | -2.0877480 |
| C | -0.6287230 | 3.6022860  | -2.8164850 |
| C | -2.0081310 | 3.5285810  | -2.8966870 |
| C | -0.3246020 | 1.4288030  | 1.4520450  |
| C | -1.1191870 | 0.7769770  | 2.3820740  |
| C | 0.0500730  | 2.7227730  | 1.7926130  |
| C | -1.5067500 | 1.3644030  | 3.5805750  |
| C | -0.3105730 | 3.3426210  | 2.9729710  |
| C | -1.1014400 | 2.6512610  | 3.8775040  |
| C | 1.7551680  | 0.7095330  | -0.1936480 |
| C | 2.2416700  | 0.2434260  | -1.4073940 |
| C | 2.7276470  | 0.9595460  | 0.7649250  |
| C | 3.5797930  | 0.0347220  | -1.6817770 |
| C | 4.0851540  | 0.8079620  | 0.5186120  |
| C | 4.5131500  | 0.3277070  | -0.7040240 |
| F | -1.5700150 | -0.4707720 | 2.1779460  |
| F | -2.2710900 | 0.6968810  | 4.4458230  |
| F | -1.4641540 | 3.2224250  | 5.0221870  |
| F | 0.0914810  | 4.5807880  | 3.2537300  |
| F | 0.8340590  | 3.4139040  | 0.9510980  |
| F | 2.4092220  | 1.3503780  | 2.0047500  |
| F | 4.9791780  | 1.0709370  | 1.4718870  |
| F | 5.8069370  | 0.1024720  | -0.9199620 |
| F | 3.9725900  | -0.4657930 | -2.8518530 |
| F | 1.3783760  | -0.0234400 | -2.4064180 |
| F | -2.6747840 | 0.9740350  | -0.4620590 |
| F | -4.0147740 | 2.5329780  | -2.1640620 |
| F | 1.3860760  | 2.9108580  | -1.9199880 |
| F | 0.0274920  | 4.4671290  | -3.5853840 |
| F | -2.6743250 | 4.3062550  | -3.7423970 |

|   |            |            |            |
|---|------------|------------|------------|
| H | -2.1717620 | -3.0638320 | -2.9126540 |
|---|------------|------------|------------|

---

Lewis Complex

R<sup>1</sup>=Ts R<sup>2</sup>=Ph

M06 free energy in solution: -3754.100205 a.u.

| Symbol | X          | Y          | Z          |
|--------|------------|------------|------------|
| C      | -4.2393710 | 1.6611640  | 2.6426080  |
| C      | -3.4069380 | 0.9866380  | 1.7483460  |
| C      | -2.7437990 | -0.1411310 | 2.2431930  |
| C      | -2.8879570 | -0.5771890 | 3.5561030  |
| C      | -3.7414060 | 0.1039570  | 4.4101530  |
| C      | -4.4170730 | 1.2275590  | 3.9495040  |
| H      | -4.7551610 | 2.5508910  | 2.2996990  |
| H      | -2.3422680 | -1.4481160 | 3.8928170  |
| H      | -3.8665060 | -0.2373170 | 5.4295530  |
| H      | -5.0787140 | 1.7737900  | 4.6104770  |
| N      | -1.8237470 | -0.8822480 | 1.3914820  |
| C      | -0.7843730 | -0.2880010 | 0.8724850  |
| N      | 0.1655490  | 0.1960560  | 0.4451890  |
| C      | -3.2116210 | 1.5198690  | 0.3436920  |
| H      | -2.1662750 | 1.7987170  | 0.1978290  |
| H      | -3.7729040 | 2.4548660  | 0.2652150  |
| C      | -3.6253170 | 0.5811410  | -0.7728480 |
| C      | -2.7578980 | 0.2699670  | -1.7377060 |
| H      | -1.7379690 | 0.6413050  | -1.7213670 |
| H      | -3.0378300 | -0.3561450 | -2.5761550 |
| S      | -2.1282380 | -2.5870110 | 0.9404850  |
| O      | -2.8150500 | -3.0928760 | 2.0991670  |
| O      | -2.7386900 | -2.6253900 | -0.3596290 |
| C      | -0.4690010 | -3.1754220 | 0.8217430  |
| C      | 0.4489920  | -2.8991240 | 1.8306750  |
| C      | -0.1492320 | -3.9678890 | -0.2757400 |
| C      | 1.7340740  | -3.4000840 | 1.7060450  |
| H      | 0.1821300  | -2.2795700 | 2.6797250  |
| C      | 1.1308020  | -4.4995200 | -0.3488630 |
| H      | -0.8788130 | -4.1473490 | -1.0555570 |
| C      | 2.0905840  | -4.2116160 | 0.6237980  |
| H      | 2.4737460  | -3.1533720 | 2.4586680  |
| H      | 1.3983400  | -5.1170270 | -1.1998730 |
| C      | 3.4842220  | -4.7679050 | 0.5221630  |
| H      | 3.7257740  | -5.0556540 | -0.5015410 |

|   |            |            |            |
|---|------------|------------|------------|
| H | 4.2218400  | -4.0394250 | 0.8639400  |
| H | 3.5788760  | -5.6566880 | 1.1518840  |
| B | 1.4587010  | 0.7825490  | -0.2710400 |
| C | 0.8445820  | 1.8316460  | -1.3580650 |
| C | 0.0011900  | 2.8344060  | -0.8942910 |
| C | 1.0199870  | 1.8004930  | -2.7327360 |
| C | -0.6658970 | 3.7239530  | -1.7134580 |
| C | 0.3770630  | 2.6809510  | -3.5936670 |
| C | -0.4734300 | 3.6441650  | -3.0837870 |
| C | 2.3408010  | 1.4875100  | 0.8973150  |
| C | 2.5882450  | 0.8146930  | 2.0865430  |
| C | 2.9178230  | 2.7452950  | 0.8008750  |
| C | 3.3352700  | 1.3367050  | 3.1250250  |
| C | 3.6752530  | 3.3079540  | 1.8187880  |
| C | 3.8816170  | 2.6023900  | 2.9891450  |
| C | 2.1542550  | -0.5391090 | -0.9249210 |
| C | 1.4059110  | -1.3521420 | -1.7682140 |
| C | 3.4731200  | -0.9330390 | -0.7435280 |
| C | 1.9127190  | -2.4584410 | -2.4189940 |
| C | 4.0156060  | -2.0511530 | -1.3640350 |
| C | 3.2329770  | -2.8138030 | -2.2088820 |
| F | 2.1207370  | -0.4363490 | 2.2504490  |
| F | 3.5409610  | 0.6377760  | 4.2399500  |
| F | 4.6039940  | 3.1272570  | 3.9714530  |
| F | 4.2057010  | 4.5196540  | 1.6767610  |
| F | 2.7808010  | 3.4870320  | -0.3041390 |
| F | 4.3079610  | -0.2444160 | 0.0421630  |
| F | 5.2751250  | -2.4126870 | -1.1271220 |
| F | 3.7220290  | -3.9185860 | -2.7653030 |
| F | 1.1316230  | -3.2238280 | -3.1786020 |
| F | 0.1144970  | -1.0622890 | -1.9945660 |
| F | -0.2047730 | 2.9577130  | 0.4299510  |
| F | -1.4829800 | 4.6427490  | -1.2046540 |
| F | 1.8283320  | 0.9050110  | -3.3113020 |
| F | 0.5730510  | 2.6018350  | -4.9067230 |
| F | -1.0970690 | 4.4872270  | -3.8964320 |
| C | -5.0242220 | 0.0765090  | -0.7725220 |
| C | -5.3335150 | -1.1764080 | -1.3137800 |
| C | -6.0677360 | 0.8493040  | -0.2520140 |
| C | -6.6445880 | -1.6330100 | -1.3456400 |
| H | -4.5333680 | -1.8065280 | -1.6789790 |

|   |            |            |            |
|---|------------|------------|------------|
| C | -7.3804570 | 0.3937080  | -0.2871260 |
| H | -5.8653120 | 1.8276390  | 0.1672360  |
| C | -7.6744550 | -0.8498210 | -0.8341710 |
| H | -6.8603210 | -2.6097680 | -1.7624510 |
| H | -8.1739600 | 1.0135930  | 0.1129620  |
| H | -8.6964210 | -1.2088350 | -0.8558550 |

---

TS

R<sup>1</sup>=Ts R<sup>2</sup>=Ph

M06 free energy in solution: -3754.061183 a.u.

---

| Symbol | X          | Y          | Z          |
|--------|------------|------------|------------|
| C      | -4.3336720 | 0.9826820  | 4.0588550  |
| C      | -3.7198120 | 0.9222310  | 2.8041430  |
| C      | -2.9793010 | -0.2212050 | 2.4920370  |
| C      | -2.8833500 | -1.2738180 | 3.4043050  |
| C      | -3.5252660 | -1.2050060 | 4.6279180  |
| C      | -4.2499010 | -0.0641170 | 4.9608080  |
| H      | -4.8996420 | 1.8717160  | 4.3163590  |
| H      | -2.3208010 | -2.1588390 | 3.1348820  |
| H      | -3.4540410 | -2.0342080 | 5.3200290  |
| H      | -4.7495560 | 0.0075440  | 5.9188900  |
| N      | -2.2987810 | -0.3552980 | 1.2287540  |
| C      | -1.2513530 | 0.4904690  | 0.8495530  |
| N      | -0.1121480 | 0.2695200  | 0.5813920  |
| C      | -3.9058260 | 2.1292960  | 1.8979980  |
| H      | -3.5123660 | 3.0017980  | 2.4284330  |
| H      | -4.9738590 | 2.3003340  | 1.7561950  |
| C      | -3.2090310 | 2.0663600  | 0.5690850  |
| C      | -1.8299190 | 2.2510530  | 0.5622440  |
| H      | -1.3819540 | 2.7565090  | 1.4130370  |
| H      | -1.3206050 | 2.3831710  | -0.3856000 |
| S      | -2.6276710 | -1.6399710 | 0.1526730  |
| O      | -3.8290190 | -2.2593640 | 0.6663030  |
| O      | -2.6106390 | -1.0799590 | -1.1819040 |
| C      | -1.2284620 | -2.7313060 | 0.2676470  |
| C      | -0.2846780 | -2.6287140 | 1.2819890  |
| C      | -1.0993760 | -3.6663590 | -0.7545200 |
| C      | 0.8247240  | -3.4615140 | 1.2474350  |
| H      | -0.3758770 | -1.8821280 | 2.0589600  |
| C      | 0.0028180  | -4.5099050 | -0.7519790 |
| H      | -1.8358410 | -3.7240790 | -1.5480480 |

|   |            |            |            |
|---|------------|------------|------------|
| C | 0.9916010  | -4.4024830 | 0.2286620  |
| H | 1.5844300  | -3.3599100 | 2.0153550  |
| H | 0.1174990  | -5.2365810 | -1.5485390 |
| C | 2.2422570  | -5.2318600 | 0.1482210  |
| H | 2.0597660  | -6.1743400 | -0.3685360 |
| H | 3.0033430  | -4.6815780 | -0.4119240 |
| H | 2.6413370  | -5.4441850 | 1.1407140  |
| B | 1.2392020  | 0.4818950  | -0.1262460 |
| C | 1.4364280  | 2.0764380  | -0.4641480 |
| C | 1.3109140  | 2.9810780  | 0.5823410  |
| C | 1.7586050  | 2.6339150  | -1.6925020 |
| C | 1.4543010  | 4.3494770  | 0.4399230  |
| C | 1.9209800  | 4.0003650  | -1.8787490 |
| C | 1.7643360  | 4.8629290  | -0.8082920 |
| C | 2.4682320  | 0.0532020  | 0.8515960  |
| C | 2.3859220  | -0.2970530 | 2.1885980  |
| C | 3.7540270  | 0.0952350  | 0.3268550  |
| C | 3.4996040  | -0.6215070 | 2.9530960  |
| C | 4.8887530  | -0.2168200 | 1.0504410  |
| C | 4.7565140  | -0.5816700 | 2.3814600  |
| C | 1.0539680  | -0.4914230 | -1.4336520 |
| C | 0.0135720  | -0.2093090 | -2.3093760 |
| C | 1.7180800  | -1.6842830 | -1.6844900 |
| C | -0.3765190 | -1.0330540 | -3.3468750 |
| C | 1.3736140  | -2.5317590 | -2.7271830 |
| C | 0.3154590  | -2.2133350 | -3.5565680 |
| F | 1.2074330  | -0.3446630 | 2.8318190  |
| F | 3.3635160  | -0.9699470 | 4.2332070  |
| F | 5.8314540  | -0.8896820 | 3.1009430  |
| F | 6.0960030  | -0.1803230 | 0.4900550  |
| F | 3.9183140  | 0.4269580  | -0.9614420 |
| F | 2.7228400  | -2.1135830 | -0.9059200 |
| F | 2.0169010  | -3.6901230 | -2.8916340 |
| F | -0.0540360 | -3.0505370 | -4.5228200 |
| F | -1.4121230 | -0.7190760 | -4.1210320 |
| F | -0.6950130 | 0.9228340  | -2.1457900 |
| F | 1.0071960  | 2.5299450  | 1.8135940  |
| F | 1.2950850  | 5.1687860  | 1.4785020  |
| F | 1.9296660  | 1.8681570  | -2.7741780 |
| F | 2.2253930  | 4.4903530  | -3.0787950 |
| F | 1.9110910  | 6.1733500  | -0.9748270 |

|   |            |            |            |
|---|------------|------------|------------|
| C | -3.9354090 | 1.6241100  | -0.5990490 |
| C | -3.4617190 | 1.8896460  | -1.8962560 |
| C | -5.0781170 | 0.8171250  | -0.4391070 |
| C | -4.1022650 | 1.3520170  | -2.9965950 |
| H | -2.6003360 | 2.5285460  | -2.0391540 |
| C | -5.6994580 | 0.2620020  | -1.5436430 |
| H | -5.4425570 | 0.5735490  | 0.5523850  |
| C | -5.2127550 | 0.5292700  | -2.8205440 |
| H | -3.7298360 | 1.5590920  | -3.9915350 |
| H | -6.5530790 | -0.3902190 | -1.4108890 |
| H | -5.7001280 | 0.0924610  | -3.6839950 |

---

8

M06 free energy in solution: -879.867255 a.u.

| Symbol | X          | Y          | Z          |
|--------|------------|------------|------------|
| C      | 3.1567920  | -1.4789150 | -0.5344260 |
| C      | 1.9173670  | -0.8488940 | -0.4475780 |
| C      | 1.9009810  | 0.4737270  | 0.0034900  |
| C      | 3.0608530  | 1.1411600  | 0.3663610  |
| C      | 4.2849930  | 0.4876470  | 0.2828780  |
| C      | 4.3299910  | -0.8232100 | -0.1730980 |
| H      | 3.1981910  | -2.5037720 | -0.8862740 |
| H      | 2.9971490  | 2.1662160  | 0.7127850  |
| H      | 5.1932490  | 1.0037220  | 0.5670450  |
| H      | 5.2788340  | -1.3408410 | -0.2457690 |
| C      | 0.2115380  | 1.4805020  | 1.3557290  |
| N      | -0.1522870 | 1.7464150  | 2.4168860  |
| C      | 0.6425440  | -1.5647500 | -0.8213210 |
| H      | 0.8942800  | -2.5698830 | -1.1667220 |
| H      | 0.1960380  | -1.0414510 | -1.6672620 |
| C      | -0.3429680 | -1.6578430 | 0.3411270  |
| C      | 0.0397930  | -2.2165650 | 1.4899940  |
| H      | 1.0530360  | -2.5822870 | 1.6188840  |
| H      | -0.6404480 | -2.3355840 | 2.3241210  |
| N      | 0.6390110  | 1.1748200  | 0.1232860  |
| C      | -0.0885230 | 1.5864090  | -1.0264280 |
| O      | 0.3339420  | 1.3160410  | -2.1166440 |
| C      | -1.3570310 | 2.3409430  | -0.7485990 |
| H      | -2.0343210 | 1.7344730  | -0.1421420 |
| H      | -1.1410140 | 3.2595510  | -0.1989170 |
| H      | -1.8209940 | 2.5761800  | -1.7025570 |

|   |            |            |            |
|---|------------|------------|------------|
| C | -1.7130480 | -1.1091750 | 0.1584740  |
| C | -2.3305530 | -1.0992930 | -1.0973890 |
| C | -2.4172090 | -0.5732770 | 1.2455960  |
| C | -3.6130890 | -0.5850950 | -1.2598710 |
| H | -1.8195460 | -1.5136710 | -1.9582920 |
| C | -3.6979380 | -0.0600770 | 1.0833650  |
| H | -1.9396990 | -0.5199630 | 2.2165320  |
| C | -4.3021030 | -0.0631360 | -0.1710730 |
| H | -4.0727410 | -0.5948530 | -2.2409990 |
| H | -4.2171700 | 0.3597000  | 1.9368040  |
| H | -5.2977750 | 0.3445330  | -0.2986650 |

|   |            |            |            |
|---|------------|------------|------------|
| C | -1.7036240 | -0.7392020 | 0.7048550  |
| C | -1.3802430 | -1.3395270 | -0.5156570 |
| C | -3.0395590 | -0.3700100 | 0.9216840  |
| C | -2.3413510 | -1.5164130 | -1.5068910 |
| H | -0.3588400 | -1.6377240 | -0.7233620 |
| C | -4.0007290 | -0.5546050 | -0.0608770 |
| H | -3.3356380 | 0.0508980  | 1.8745460  |
| C | -3.6539110 | -1.1203330 | -1.2869440 |
| H | -2.0542080 | -1.9570420 | -2.4538680 |
| H | -5.0264700 | -0.2625140 | 0.1314710  |
| H | -4.4039850 | -1.2585720 | -2.0564650 |

TS<sub>8/9</sub>

M06 free energy in solution: -879.858731 a.u.

| Symbol | X          | Y          | Z          |
|--------|------------|------------|------------|
| C      | 2.8056390  | -1.7674120 | 0.5341550  |
| C      | 1.7198490  | -0.8860870 | 0.6321340  |
| C      | 1.7737780  | 0.2587290  | -0.1648460 |
| C      | 2.8490880  | 0.5128270  | -1.0142550 |
| C      | 3.9050120  | -0.3772190 | -1.0913910 |
| C      | 3.8785810  | -1.5280780 | -0.3076360 |
| H      | 2.7943290  | -2.6657290 | 1.1429630  |
| H      | 2.8324790  | 1.4117840  | -1.6180770 |
| H      | 4.7362770  | -0.1789730 | -1.7559030 |
| H      | 4.6946680  | -2.2389430 | -0.3546370 |
| C      | 0.6831490  | 2.1597850  | 0.7832230  |
| N      | 0.6920760  | 2.9703540  | 1.6033540  |
| C      | 0.6383950  | -1.2772680 | 1.6359000  |
| H      | 1.1119160  | -1.2482460 | 2.6208600  |
| H      | 0.3996200  | -2.3292050 | 1.4453520  |
| C      | -0.6547260 | -0.4951300 | 1.7307640  |
| C      | -0.8278320 | 0.3600450  | 2.7406560  |
| H      | -0.0492720 | 0.5138020  | 3.4784840  |
| H      | -1.7193130 | 0.9649210  | 2.8481040  |
| N      | 0.6922680  | 1.2230230  | -0.1724480 |
| C      | -0.1475700 | 1.3204000  | -1.3216320 |
| O      | 0.1230610  | 0.6871520  | -2.3028000 |
| C      | -1.3743260 | 2.1764300  | -1.1862260 |
| H      | -1.4350430 | 2.8336830  | -2.0530130 |
| H      | -2.2273600 | 1.4918210  | -1.2147050 |
| H      | -1.4117690 | 2.7575940  | -0.2678000 |

9

M06 free energy in solution: -879.866497 a.u.

| Symbol | X          | Y          | Z          |
|--------|------------|------------|------------|
| C      | 0.2465960  | 2.5124740  | 0.7774390  |
| C      | -0.4356810 | 1.2965020  | 0.7989780  |
| C      | -1.3509390 | 1.0581910  | -0.2282930 |
| C      | -1.5700780 | 1.9733190  | -1.2482360 |
| C      | -0.8662420 | 3.1696990  | -1.2559410 |
| C      | 0.0388020  | 3.4401220  | -0.2355980 |
| H      | 0.9616370  | 2.7243290  | 1.5645760  |
| H      | -2.2860220 | 1.7377860  | -2.0260110 |
| H      | -1.0272340 | 3.8865730  | -2.0511950 |
| H      | 0.5891010  | 4.3730640  | -0.2313280 |
| C      | -2.9806370 | -0.4091290 | 0.7311840  |
| N      | -3.7330980 | -0.6132810 | 1.5812250  |
| C      | -0.1540190 | 0.2651790  | 1.8704640  |
| H      | -1.0704370 | -0.0218670 | 2.3915210  |
| H      | 0.4983040  | 0.7216600  | 2.6194380  |
| C      | 0.5065210  | -0.9777730 | 1.3030980  |
| C      | -0.0452640 | -2.1822240 | 1.4564420  |
| H      | -0.9848190 | -2.3008480 | 1.9878250  |
| H      | 0.4396770  | -3.0777970 | 1.0842420  |
| N      | -2.0976630 | -0.1817930 | -0.2478050 |
| C      | -1.7728040 | -1.2074620 | -1.1790320 |
| C      | -2.5690580 | -2.4741270 | -1.0343920 |
| H      | -2.3877670 | -2.9240280 | -0.0560900 |
| H      | -3.6381670 | -2.2682160 | -1.1139200 |
| H      | -2.2605220 | -3.1571680 | -1.8209050 |
| O      | -0.9241410 | -1.0135860 | -2.0023000 |



|   |           |            |            |
|---|-----------|------------|------------|
| C | 1.7865950 | -0.7892630 | 0.5689100  |
| C | 2.7711940 | 0.0731900  | 1.0616250  |
| C | 2.0274570 | -1.4638650 | -0.6310380 |
| C | 3.9738430 | 0.2380780  | 0.3866430  |
| H | 2.6084390 | 0.6044560  | 1.9923750  |
| C | 3.2287260 | -1.2947730 | -1.3093160 |
| H | 1.2511730 | -2.0925720 | -1.0503520 |
| C | 4.2066230 | -0.4458130 | -0.8023490 |
| H | 4.7296130 | 0.9023960  | 0.7887720  |
| H | 3.3947490 | -1.8169070 | -2.2440990 |
| H | 5.1409230 | -0.3106020 | -1.3339150 |

10

M06 free energy in solution: -3087.942339 a.u.

| Symbol | X          | Y          | Z          |
|--------|------------|------------|------------|
| C      | 4.3148740  | 0.9077450  | 2.5468650  |
| C      | 3.5132700  | 0.7003230  | 1.4251980  |
| C      | 2.8976930  | 1.8243460  | 0.8756780  |
| C      | 3.0665450  | 3.1032740  | 1.3847500  |
| C      | 3.8840170  | 3.2826050  | 2.4922470  |
| C      | 4.5013030  | 2.1800470  | 3.0740950  |
| H      | 4.8118620  | 0.0566270  | 2.9978730  |
| H      | 2.5682930  | 3.9389760  | 0.9085690  |
| H      | 4.0323910  | 4.2746500  | 2.8992280  |
| H      | 5.1371910  | 2.3121940  | 3.9408720  |
| C      | 0.8808400  | 1.1263780  | -0.1541560 |
| N      | -0.1546120 | 0.6548160  | -0.0110280 |
| C      | 3.3744950  | -0.6692230 | 0.8008020  |
| H      | 2.3215160  | -0.9337730 | 0.6734270  |
| H      | 3.8024730  | -1.3987260 | 1.4941360  |
| C      | 4.0878880  | -0.7983760 | -0.5351320 |
| C      | 3.4412680  | -1.2046940 | -1.6272160 |
| H      | 2.3854200  | -1.4552340 | -1.5948040 |
| H      | 3.9614200  | -1.3313280 | -2.5702930 |
| B      | -1.5937830 | 0.0166190  | 0.0754620  |
| C      | -1.6752790 | -0.9554850 | -1.2367660 |
| C      | -0.6741790 | -1.9007540 | -1.4245510 |
| C      | -2.6915480 | -0.9753160 | -2.1810150 |
| C      | -0.6400130 | -2.7878630 | -2.4854210 |
| C      | -2.7016210 | -1.8540740 | -3.2550650 |
| C      | -1.6687450 | -2.7611340 | -3.4121940 |

|   |            |            |            |
|---|------------|------------|------------|
| C | -1.6882100 | -0.9243740 | 1.3940880  |
| C | -0.7092690 | -1.1460370 | 2.3477720  |
| C | -2.8585050 | -1.6556100 | 1.5576430  |
| C | -0.8727990 | -2.0334910 | 3.4027020  |
| C | -3.0660920 | -2.5431230 | 2.5950060  |
| C | -2.0575360 | -2.7337210 | 3.5274640  |
| C | -2.6064080 | 1.2904730  | 0.0473650  |
| C | -2.5446720 | 2.1620910  | -1.0339490 |
| C | -3.5339110 | 1.6287200  | 1.0214670  |
| C | -3.3426930 | 3.2796760  | -1.1741650 |
| C | -4.3621790 | 2.7393160  | 0.9185160  |
| C | -4.2664480 | 3.5687390  | -0.1820980 |
| F | 0.4725530  | -0.5071960 | 2.2951240  |
| F | 0.1020430  | -2.2139910 | 4.2915740  |
| F | -2.2308660 | -3.5834200 | 4.5332050  |
| F | -4.2106130 | -3.2102970 | 2.7111600  |
| F | -3.8577940 | -1.4841510 | 0.6818510  |
| F | -3.6836030 | 0.8972280  | 2.1304380  |
| F | -5.2407200 | 3.0162770  | 1.8780770  |
| F | -5.0483110 | 4.6357750  | -0.2893470 |
| F | -3.2367950 | 4.0718100  | -2.2383150 |
| F | -1.6723200 | 1.9101600  | -2.0294730 |
| F | 0.3369850  | -1.9813620 | -0.5380860 |
| F | 0.3602980  | -3.6558120 | -2.6185360 |
| F | -3.7291940 | -0.1384600 | -2.0974170 |
| F | -3.6954380 | -1.8309220 | -4.1382800 |
| F | -1.6661320 | -3.6030550 | -4.4382260 |
| N | 2.0658480  | 1.6639310  | -0.3068580 |
| C | 2.5782700  | 1.9892060  | -1.6289950 |
| C | 1.6460020  | 1.6584440  | -2.7534290 |
| H | 1.4682880  | 0.5802810  | -2.7785130 |
| H | 0.6845880  | 2.1596240  | -2.6212970 |
| H | 2.1086060  | 1.9753480  | -3.6838560 |
| O | 3.6564400  | 2.4841890  | -1.7047270 |
| C | 5.5629790  | -0.5701460 | -0.5528890 |
| C | 6.1290600  | 0.6903960  | -0.3335280 |
| C | 6.4077520  | -1.6582000 | -0.7889520 |
| C | 7.5102090  | 0.8502190  | -0.3519180 |
| H | 5.4907700  | 1.5525190  | -0.1814650 |
| C | 7.7886810  | -1.4962030 | -0.8008120 |
| H | 5.9711560  | -2.6366770 | -0.9563770 |

|   |           |            |            |
|---|-----------|------------|------------|
| C | 8.3431760 | -0.2406020 | -0.5791800 |
| H | 7.9361710 | 1.8341670  | -0.1942920 |
| H | 8.4296930 | -2.3505450 | -0.9835530 |
| H | 9.4188000 | -0.1106230 | -0.5890440 |

---

TS<sub>10/11</sub>

M06 free energy in solution: -3087.904211 a.u.

| Symbol | X          | Y          | Z          |
|--------|------------|------------|------------|
| C      | 4.2043940  | 4.2348270  | 0.0586090  |
| C      | 3.7420610  | 2.9667670  | -0.2801100 |
| C      | 2.6944690  | 2.8592000  | -1.1956950 |
| C      | 2.1031140  | 3.9827700  | -1.7540970 |
| C      | 2.5826370  | 5.2430560  | -1.4165520 |
| C      | 3.6321690  | 5.3666370  | -0.5125970 |
| H      | 5.0148720  | 4.3373610  | 0.7716460  |
| H      | 1.2758160  | 3.8549770  | -2.4411640 |
| H      | 2.1319150  | 6.1257360  | -1.8522710 |
| H      | 4.0021920  | 6.3482610  | -0.2435140 |
| C      | 1.2785830  | 1.0165040  | -0.5477650 |
| N      | 0.1534950  | 0.6191020  | -0.6957080 |
| C      | 4.3479460  | 1.7133870  | 0.2871060  |
| H      | 4.9579370  | 1.9510060  | 1.1708880  |
| H      | 5.0511200  | 1.2829680  | -0.4317270 |
| C      | 3.3788840  | 0.6768620  | 0.7634170  |
| C      | 2.0386590  | 1.0319380  | 1.0340680  |
| H      | 1.8640430  | 2.0695760  | 1.3220850  |
| H      | 1.4511420  | 0.2992520  | 1.5735780  |
| B      | -1.0763850 | -0.1137770 | -0.1390430 |
| C      | -1.0563860 | -0.1876460 | 1.5095860  |
| C      | -0.9081760 | 0.9994300  | 2.2166800  |
| C      | -1.2473990 | -1.3168350 | 2.2928850  |
| C      | -0.9105840 | 1.0838350  | 3.5976250  |
| C      | -1.2620740 | -1.2790820 | 3.6811010  |
| C      | -1.0909110 | -0.0732690 | 4.3373260  |
| C      | -2.4299390 | 0.7133390  | -0.5196110 |
| C      | -2.4905220 | 1.9785220  | -1.0823440 |
| C      | -3.6547870 | 0.1527790  | -0.1800380 |
| C      | -3.6910480 | 2.6382500  | -1.3160550 |
| C      | -4.8699460 | 0.7733830  | -0.3960760 |
| C      | -4.8848110 | 2.0332330  | -0.9737130 |
| C      | -0.9521250 | -1.5777220 | -0.8703910 |

|   |            |            |            |
|---|------------|------------|------------|
| C | 0.1524770  | -2.3623990 | -0.5709280 |
| C | -1.7664370 | -2.0838250 | -1.8731350 |
| C | 0.4564240  | -3.5569660 | -1.1922150 |
| C | -1.5100970 | -3.2886400 | -2.5176510 |
| C | -0.3922710 | -4.0286050 | -2.1798960 |
| F | -1.3828930 | 2.6498620  | -1.4278320 |
| F | -3.6995710 | 3.8532200  | -1.8657450 |
| F | -6.0403370 | 2.6543010  | -1.1940790 |
| F | -6.0168460 | 0.1831660  | -0.0626150 |
| F | -3.6784810 | -1.0696460 | 0.3732440  |
| F | -2.8517280 | -1.4251150 | -2.2934400 |
| F | -2.3268470 | -3.7308080 | -3.4715640 |
| F | -0.1299280 | -5.1744570 | -2.7997330 |
| F | 1.5597670  | -4.2340870 | -0.8703220 |
| F | 1.0279550  | -1.9402770 | 0.3649240  |
| F | -0.7120950 | 2.1474160  | 1.5438440  |
| F | -0.7369050 | 2.2503920  | 4.2170130  |
| F | -1.4318460 | -2.5205250 | 1.7396050  |
| F | -1.4428850 | -2.3925530 | 4.3891040  |
| F | -1.0993550 | -0.0251100 | 5.6654950  |
| N | 2.1695190  | 1.5601720  | -1.5065550 |
| C | 2.8291040  | 0.7308940  | -2.4224760 |
| C | 2.2410100  | -0.6451170 | -2.6145180 |
| H | 2.3222760  | -1.2213530 | -1.6877260 |
| H | 1.1838130  | -0.5873400 | -2.8776440 |
| H | 2.8052470  | -1.1413770 | -3.3999030 |
| O | 3.8190900  | 1.1245030  | -2.9905790 |
| C | 3.8116340  | -0.7042370 | 0.8510770  |
| C | 4.6994940  | -1.2441500 | -0.1008000 |
| C | 3.3045590  | -1.5405460 | 1.8633190  |
| C | 5.0322990  | -2.5874060 | -0.0577250 |
| H | 5.0646680  | -0.6368130 | -0.9206170 |
| C | 3.6769650  | -2.8708510 | 1.9238600  |
| H | 2.6377630  | -1.1354090 | 2.6148750  |
| C | 4.5272240  | -3.3989210 | 0.9552820  |
| H | 5.6805010  | -3.0048350 | -0.8175220 |
| H | 3.2910960  | -3.5035220 | 2.7125300  |
| H | 4.7920650  | -4.4489130 | 0.9857630  |

---

11

M06 free energy in solution: -3087.977890 a.u.



|   |            |            |            |
|---|------------|------------|------------|
| H | -2.3030350 | -2.1769260 | -2.5181120 |
| H | -2.7514260 | -0.2868640 | 2.0663270  |
| H | -4.3399560 | -1.9969230 | 1.2548780  |
| H | -4.1270320 | -2.9571680 | -1.0105140 |
| C | -0.2512810 | 2.8884080  | -1.2253020 |
| N | -1.1286740 | 3.6274310  | -1.2706990 |
| C | -0.3939730 | -0.1412090 | -1.7860770 |
| H | -0.7982850 | 0.6069280  | -2.4768230 |
| H | 0.2423790  | -0.8220180 | -2.3522100 |
| C | 0.4140730  | 0.5569460  | -0.6537300 |
| C | 0.8653310  | 1.9482010  | -1.1631030 |
| H | 1.2607550  | 1.8365010  | -2.1750570 |
| H | 1.6584030  | 2.3818570  | -0.5551970 |
| N | -0.5672050 | 0.6304980  | 0.4612350  |
| C | -0.3499930 | 1.2254510  | 1.6921120  |
| C | 0.8986020  | 2.0594050  | 1.8799750  |
| H | 1.7944100  | 1.5862440  | 1.4784820  |
| H | 0.7619950  | 3.0393710  | 1.4162510  |
| H | 1.0144480  | 2.2042970  | 2.9511220  |
| O | -1.1466540 | 1.1047930  | 2.5989090  |
| C | 1.6159830  | -0.3084680 | -0.2689460 |
| C | 1.4985150  | -1.2734520 | 0.7331260  |
| C | 2.8267000  | -0.1991710 | -0.9564510 |
| C | 2.5703810  | -2.1034110 | 1.0434400  |
| H | 0.5680460  | -1.3825970 | 1.2780140  |
| C | 3.8987240  | -1.0274040 | -0.6420160 |
| H | 2.9516900  | 0.5314120  | -1.7471900 |
| C | 3.7746580  | -1.9823950 | 0.3602530  |
| H | 2.4599270  | -2.8456120 | 1.8248620  |
| H | 4.8322160  | -0.9224530 | -1.1817440 |
| H | 4.6101140  | -2.6262150 | 0.6066820  |

13

M06 free energy in solution: -555.470479 a.u.

| Symbol | X          | Y          | Z          |
|--------|------------|------------|------------|
| C      | 0.3208710  | -2.1530290 | -0.3137810 |
| C      | -0.0740580 | -0.8284860 | -0.4841550 |
| C      | 0.8834620  | 0.1445180  | -0.2201830 |
| C      | 2.1741360  | -0.1382760 | 0.1844050  |
| C      | 2.5355810  | -1.4733330 | 0.3426980  |
| C      | 1.6104650  | -2.4794680 | 0.0951960  |

|   |            |            |            |
|---|------------|------------|------------|
| H | -0.4040620 | -2.9369470 | -0.5034930 |
| H | 2.8837330  | 0.6584660  | 0.3740530  |
| H | 3.5420160  | -1.7164630 | 0.6588090  |
| H | 1.8910450  | -3.5177630 | 0.2189700  |
| C | 1.2368270  | 2.4363580  | -0.1200340 |
| N | 1.9268190  | 3.3274530  | 0.1171300  |
| C | -1.4734310 | -0.4563130 | -0.8861560 |
| H | -1.9352150 | -1.3066270 | -1.3984590 |
| H | -1.4492040 | 0.3612660  | -1.6142870 |
| C | -2.3761960 | -0.0421830 | 0.2608930  |
| C | -1.9999650 | -0.0601630 | 1.5363400  |
| H | -1.0076480 | -0.3739410 | 1.8398900  |
| H | -2.6865180 | 0.2406970  | 2.3195940  |
| C | -3.7521140 | 0.3852200  | -0.1707340 |
| H | -4.2488330 | -0.4195310 | -0.7213780 |
| H | -4.3718710 | 0.6560090  | 0.6839960  |
| H | -3.6924270 | 1.2442690  | -0.8457670 |
| O | 0.4347240  | 1.4761650  | -0.3973460 |

TS<sub>13/14</sub>

M06 free energy in solution: -555.459900 a.u.

| Symbol | X          | Y          | Z          |
|--------|------------|------------|------------|
| C      | -1.8740490 | -1.4895170 | -0.3542340 |
| C      | -0.6483810 | -0.8812910 | -0.0496800 |
| C      | -0.7227770 | 0.4491660  | 0.3366890  |
| C      | -1.9082950 | 1.1639900  | 0.4223460  |
| C      | -3.0999900 | 0.5311220  | 0.1069820  |
| C      | -3.0778610 | -0.8066010 | -0.2805110 |
| H      | -1.8650360 | -2.5292740 | -0.6642740 |
| H      | -1.8801110 | 2.2000160  | 0.7385850  |
| H      | -4.0337930 | 1.0751740  | 0.1668830  |
| H      | -4.0005580 | -1.3165000 | -0.5281220 |
| C      | 0.9216200  | 1.9943880  | -0.1043500 |
| N      | 1.3627480  | 2.7882540  | -0.8130060 |
| C      | 0.6107410  | -1.7249960 | -0.1798680 |
| H      | 0.5364200  | -2.2437260 | -1.1389910 |
| H      | 0.5637250  | -2.4999740 | 0.5932720  |
| C      | 1.9509620  | -1.0258730 | -0.1015120 |
| C      | 2.5423530  | -0.5594930 | -1.1980630 |
| H      | 2.0800280  | -0.6576100 | -2.1750320 |
| H      | 3.5013320  | -0.0554690 | -1.1500060 |

|   |           |            |           |
|---|-----------|------------|-----------|
| C | 2.5782180 | -0.9417990 | 1.2626820 |
| H | 1.8748460 | -0.5304080 | 1.9907670 |
| H | 2.8520700 | -1.9434920 | 1.6088600 |
| H | 3.4756240 | -0.3220950 | 1.2529390 |
| O | 0.4651220 | 1.1313740  | 0.7291600 |

14

M06 free energy in solution: -555.468345 a.u.

| Symbol | X          | Y          | Z          |
|--------|------------|------------|------------|
| C      | -1.6766840 | -1.1477520 | -0.9177420 |
| C      | -0.5317270 | -0.4391160 | -0.5481240 |
| C      | -0.7344970 | 0.6389090  | 0.3077910  |
| C      | -1.9701500 | 1.0128210  | 0.7996860  |
| C      | -3.0880240 | 0.2820090  | 0.4139410  |
| C      | -2.9381990 | -0.7965930 | -0.4500050 |
| H      | -1.5658010 | -1.9972900 | -1.5823210 |
| H      | -2.0398170 | 1.8601410  | 1.4698350  |
| H      | -4.0659040 | 0.5588870  | 0.7865880  |
| H      | -3.8035580 | -1.3716570 | -0.7555020 |
| C      | 1.0868270  | 1.9986690  | -0.0881770 |
| N      | 1.7485530  | 2.5676630  | -0.8402260 |
| C      | 0.8402530  | -0.8513000 | -1.0371850 |
| H      | 1.2480190  | -0.0949610 | -1.7136450 |
| H      | 0.7112140  | -1.7662230 | -1.6239980 |
| C      | 1.8338830  | -1.1315480 | 0.0736760  |
| C      | 3.0599330  | -0.6164490 | 0.0466890  |
| H      | 3.3725560  | 0.0571730  | -0.7438110 |
| H      | 3.7837740  | -0.8503610 | 0.8198070  |
| C      | 1.3584990  | -2.0514950 | 1.1640950  |
| H      | 0.5506780  | -1.5875710 | 1.7383000  |
| H      | 0.9544290  | -2.9756320 | 0.7387590  |
| H      | 2.1681400  | -2.3034650 | 1.8487470  |
| O      | 0.3757140  | 1.3885490  | 0.7888690  |

15

M06 free energy in solution: -2763.547582 a.u.

| Symbol | X         | Y         | Z          |
|--------|-----------|-----------|------------|
| C      | 5.4858430 | 1.0911440 | -0.8550530 |
| C      | 4.3068910 | 0.3793290 | -1.0900000 |
| C      | 3.5027960 | 0.8908790 | -2.0986290 |
| C      | 3.7904900 | 2.0028970 | -2.8613820 |

|   |            |            |            |
|---|------------|------------|------------|
| C | 4.9730240  | 2.6825590  | -2.5946940 |
| C | 5.8159700  | 2.2249060  | -1.5881590 |
| H | 6.1546240  | 0.7356670  | -0.0797050 |
| H | 3.1048560  | 2.3182400  | -3.6370120 |
| H | 5.2289240  | 3.5608190  | -3.1729770 |
| H | 6.7396530  | 2.7483880  | -1.3762290 |
| C | 1.3495760  | 0.1573970  | -1.6286930 |
| N | 0.4529940  | 0.1110650  | -0.9199890 |
| C | 3.9591740  | -0.8492470 | -0.2769060 |
| H | 3.1885700  | -0.5956190 | 0.4560430  |
| H | 4.8525500  | -1.1152090 | 0.2965360  |
| C | 3.5251240  | -2.0585550 | -1.0803690 |
| C | 2.4474570  | -2.7561260 | -0.7307610 |
| H | 1.8252650  | -2.4606590 | 0.1085150  |
| H | 2.1509070  | -3.6465990 | -1.2735790 |
| C | 4.4046900  | -2.4365870 | -2.2393380 |
| H | 4.3857140  | -1.6641990 | -3.0145240 |
| H | 5.4448850  | -2.5338830 | -1.9135380 |
| H | 4.0850200  | -3.3783890 | -2.6843500 |
| B | -0.7691780 | 0.0294750  | 0.1079150  |
| C | -1.9619530 | -0.7048400 | -0.7187170 |
| C | -1.7027660 | -1.8987360 | -1.3814680 |
| C | -3.2634510 | -0.2377790 | -0.8317780 |
| C | -2.6429770 | -2.5855630 | -2.1245150 |
| C | -4.2381970 | -0.8963020 | -1.5695070 |
| C | -3.9261180 | -2.0726730 | -2.2227270 |
| C | -0.1528880 | -0.8403910 | 1.3395750  |
| C | 1.0250610  | -0.4025810 | 1.9329410  |
| C | -0.6522210 | -2.0349740 | 1.8347320  |
| C | 1.6983980  | -1.0982910 | 2.9183330  |
| C | -0.0125350 | -2.7632310 | 2.8302460  |
| C | 1.1706900  | -2.2969130 | 3.3716410  |
| C | -1.1043410 | 1.5731360  | 0.4896890  |
| C | -1.2488920 | 2.5176040  | -0.5185230 |
| C | -1.3042860 | 2.0454930  | 1.7776540  |
| C | -1.5535370 | 3.8457510  | -0.2853750 |
| C | -1.6120000 | 3.3695490  | 2.0552990  |
| C | -1.7338150 | 4.2757310  | 1.0185940  |
| F | 1.5778590  | 0.7550030  | 1.5276130  |
| F | 2.8410660  | -0.6375210 | 3.4224960  |
| F | 1.7928960  | -2.9873490 | 4.3192570  |

|   |            |            |            |
|---|------------|------------|------------|
| F | -0.5317830 | -3.9082150 | 3.2662010  |
| F | -1.7913840 | -2.5590310 | 1.3694570  |
| F | -1.2230240 | 1.2272760  | 2.8350730  |
| F | -1.7928210 | 3.7730220  | 3.3115840  |
| F | -2.0282470 | 5.5468050  | 1.2693890  |
| F | -1.6821910 | 4.7068510  | -1.2933090 |
| F | -1.1233260 | 2.1426940  | -1.8019000 |
| F | -0.4849820 | -2.4540900 | -1.2822620 |
| F | -2.3356950 | -3.7291130 | -2.7336900 |
| F | -3.6603210 | 0.8839430  | -0.2180260 |
| F | -5.4718450 | -0.4011170 | -1.6509090 |
| F | -4.8480770 | -2.7113980 | -2.9340960 |
| O | 2.2874480  | 0.1919040  | -2.4629240 |

TS<sub>15/16</sub>

M06 free energy in solution: -2763.509359 a.u.

| Symbol | X          | Y          | Z          |
|--------|------------|------------|------------|
| C      | -5.7027170 | -0.0569450 | -0.5499250 |
| C      | -4.5169170 | 0.6523910  | -0.7431040 |
| C      | -3.7412830 | 0.3092190  | -1.8505180 |
| C      | -4.1116670 | -0.6916930 | -2.7332750 |
| C      | -5.2981010 | -1.3799770 | -2.5194180 |
| C      | -6.0945930 | -1.0609200 | -1.4240240 |
| H      | -6.3220990 | 0.1902160  | 0.3051390  |
| H      | -3.4629280 | -0.9125150 | -3.5712670 |
| H      | -5.5953050 | -2.1637300 | -3.2044640 |
| H      | -7.0219060 | -1.5920160 | -1.2505360 |
| C      | -1.5724440 | 0.9419140  | -1.2670610 |
| N      | -0.6237650 | 0.2201340  | -1.1551960 |
| C      | -4.1171280 | 1.6957730  | 0.2939660  |
| H      | -3.7758810 | 1.1789660  | 1.1935780  |
| H      | -4.9995850 | 2.2912230  | 0.5414020  |
| C      | -3.0464010 | 2.5907920  | -0.2342690 |
| C      | -1.7174920 | 2.2762430  | -0.0039590 |
| H      | -1.4723410 | 1.7033060  | 0.8866460  |
| H      | -0.9620020 | 2.9855630  | -0.3326070 |
| C      | -3.4537660 | 3.6749410  | -1.1508340 |
| H      | -4.2434710 | 3.3402000  | -1.8281900 |
| H      | -3.8933000 | 4.4642000  | -0.5246730 |
| H      | -2.6164150 | 4.0941720  | -1.7044000 |
| B      | 0.5446690  | -0.0267660 | -0.1629130 |

|   |            |            |            |
|---|------------|------------|------------|
| C | -0.0161980 | -0.6162500 | 1.2635070  |
| C | -1.3130570 | -0.9856640 | 1.5823250  |
| C | 0.9235230  | -0.8853050 | 2.2540260  |
| C | -1.6680240 | -1.5576260 | 2.7973870  |
| C | 0.6184300  | -1.4581600 | 3.4728910  |
| C | -0.6968240 | -1.7993880 | 3.7476820  |
| C | 1.4754950  | -1.2265770 | -0.7848900 |
| C | 2.8589050  | -1.2359310 | -0.8853720 |
| C | 0.8457780  | -2.3921920 | -1.2059650 |
| C | 3.5733090  | -2.3091710 | -1.3967520 |
| C | 1.5209350  | -3.4844470 | -1.7230250 |
| C | 2.9005160  | -3.4391780 | -1.8223790 |
| C | 1.3245250  | 1.4107800  | -0.0356560 |
| C | 1.3728130  | 2.2271840  | 1.0843230  |
| C | 1.9429780  | 1.9349760  | -1.1657810 |
| C | 2.0088340  | 3.4609120  | 1.1031550  |
| C | 2.5882570  | 3.1574300  | -1.1927740 |
| C | 2.6232220  | 3.9284080  | -0.0421850 |
| F | 3.5919510  | -0.1873790 | -0.4857260 |
| F | 4.9033590  | -2.2609440 | -1.4814400 |
| F | 3.5731490  | -4.4760520 | -2.3151120 |
| F | 0.8627120  | -4.5758740 | -2.1154810 |
| F | -0.4864860 | -2.5083600 | -1.0971820 |
| F | 1.9402150  | 1.2342520  | -2.3083650 |
| F | 3.1744260  | 3.6003500  | -2.3039730 |
| F | 3.2324930  | 5.1095540  | -0.0440950 |
| F | 2.0169150  | 4.2027330  | 2.2103500  |
| F | 0.7561120  | 1.8798900  | 2.2260820  |
| F | -2.3338290 | -0.7958210 | 0.7233620  |
| F | -2.9386660 | -1.8734940 | 3.0475430  |
| F | 2.2066760  | -0.5588610 | 2.0407280  |
| F | 1.5639100  | -1.6827240 | 4.3836890  |
| F | -1.0173320 | -2.3498730 | 4.9146030  |
| O | -2.5584540 | 1.0134360  | -2.1716380 |

16

M06 free energy in solution: -2763.606193 a.u.

| Symbol | X          | Y          | Z          |
|--------|------------|------------|------------|
| C      | -3.9285420 | -0.7873770 | -0.3764350 |
| C      | -3.6444680 | -0.3084920 | 0.8916890  |
| C      | -3.3351290 | 1.0342160  | 1.0705730  |

|   |            |            |            |
|---|------------|------------|------------|
| C | -3.2557490 | 1.9270730  | 0.0148460  |
| C | -3.5286220 | 1.4306580  | -1.2597070 |
| C | -3.8726600 | 0.0950360  | -1.4568630 |
| H | -4.1877630 | -1.8296770 | -0.5281990 |
| H | -2.9907360 | 2.9629060  | 0.1843880  |
| H | -3.4697890 | 2.0991100  | -2.1101200 |
| H | -4.0809450 | -0.2641770 | -2.4574880 |
| C | -0.8086800 | -0.0736800 | 2.5160870  |
| N | -0.1847450 | -0.0531380 | 1.5627550  |
| C | -3.6229860 | -0.9839590 | 2.2371700  |
| H | -2.9467980 | -1.8434080 | 2.2631510  |
| H | -4.6134840 | -1.3368450 | 2.5326300  |
| C | -3.1479610 | 0.1584940  | 3.1767670  |
| C | -1.6956470 | -0.0511270 | 3.6657490  |
| H | -1.5863770 | -0.9871020 | 4.2178910  |
| H | -1.3873470 | 0.7816280  | 4.3023280  |
| C | -4.0608680 | 0.3887510  | 4.3643450  |
| H | -5.0739850 | 0.5711380  | 4.0039080  |
| H | -4.0709430 | -0.4911380 | 5.0108850  |
| H | -3.7302680 | 1.2536710  | 4.9413680  |
| B | 0.5879330  | -0.0774630 | 0.1898740  |
| C | 0.6646370  | 1.4316020  | -0.4043490 |
| C | 0.1036400  | 2.5817910  | 0.1272900  |
| C | 1.3932110  | 1.6105500  | -1.5738600 |
| C | 0.2247690  | 3.8256100  | -0.4776830 |
| C | 1.5448420  | 2.8304880  | -2.2031800 |
| C | 0.9500290  | 3.9519010  | -1.6464500 |
| C | 2.0974410  | -0.5820090 | 0.5442120  |
| C | 2.7940350  | -1.5735700 | -0.1313560 |
| C | 2.7997330  | 0.0557930  | 1.5588930  |
| C | 4.0968440  | -1.9255270 | 0.1879660  |
| C | 4.0978550  | -0.2687180 | 1.9112670  |
| C | 4.7509950  | -1.2724160 | 1.2171490  |
| C | -0.2821990 | -1.1259080 | -0.7049490 |
| C | -0.8695170 | -0.8818950 | -1.9366630 |
| C | -0.5025500 | -2.4002580 | -0.1905540 |
| C | -1.6091740 | -1.8383050 | -2.6194970 |
| C | -1.2479390 | -3.3720180 | -0.8280950 |
| C | -1.8073030 | -3.0852880 | -2.0628300 |
| F | 2.2355000  | -2.2392170 | -1.1481360 |
| F | 4.7253730  | -2.8836900 | -0.4907160 |

|   |            |            |            |
|---|------------|------------|------------|
| F | 5.9987380  | -1.6020440 | 1.5332700  |
| F | 4.7208150  | 0.3720050  | 2.8987640  |
| F | 2.2147380  | 1.0498380  | 2.2463580  |
| F | 0.0371680  | -2.7344920 | 0.9941830  |
| F | -1.4347020 | -4.5690460 | -0.2742520 |
| F | -2.5462400 | -3.9937600 | -2.6909430 |
| F | -2.1779810 | -1.5379560 | -3.7869900 |
| F | -0.7799390 | 0.3082350  | -2.5395970 |
| F | -0.6032780 | 2.5566820  | 1.2667690  |
| F | -0.3556260 | 4.8967040  | 0.0638280  |
| F | 1.9489250  | 0.5416740  | -2.1636820 |
| F | 2.2383330  | 2.9396780  | -3.3345220 |
| F | 1.0736730  | 5.1367540  | -2.2354280 |
| O | -3.1194620 | 1.3652980  | 2.3789050  |

---

17

M06 free energy in solution: -555.519646 a.u.

---

| Symbol | X          | Y          | Z          |
|--------|------------|------------|------------|
| C      | 2.0847030  | -0.0379870 | 1.3792350  |
| C      | 0.8612600  | -0.1992880 | 0.7509190  |
| C      | 0.7662880  | -0.0480880 | -0.6278900 |
| C      | 1.8601350  | 0.2630530  | -1.4178890 |
| C      | 3.0871280  | 0.4259050  | -0.7742220 |
| C      | 3.2045620  | 0.2751070  | 0.6055300  |
| H      | 2.1718990  | -0.1506000 | 2.4539970  |
| H      | 1.7558150  | 0.3742000  | -2.4895930 |
| H      | 3.9633090  | 0.6711640  | -1.3627410 |
| H      | 4.1692850  | 0.4036580  | 1.0804840  |
| C      | -2.4485390 | 1.4448600  | 0.0592900  |
| N      | -2.2718750 | 2.5723890  | 0.1862420  |
| C      | -0.5158630 | -0.4908960 | 1.2852080  |
| H      | -0.9087370 | 0.3666100  | 1.8399910  |
| H      | -0.5469160 | -1.3616120 | 1.9422420  |
| C      | -1.3150470 | -0.7514850 | -0.0177430 |
| C      | -2.6459590 | 0.0034450  | -0.0859840 |
| H      | -3.3142360 | -0.3425550 | 0.7057330  |
| H      | -3.1281350 | -0.1852340 | -1.0477230 |
| C      | -1.5294260 | -2.2359310 | -0.2646620 |
| H      | -0.5679860 | -2.7526350 | -0.2274780 |
| H      | -2.1824370 | -2.6594930 | 0.5012160  |
| H      | -1.9772460 | -2.3964970 | -1.2466950 |

O -0.4983670 -0.2332380 -1.1004850

18

M06 free energy in solution: -2763.549647 a.u.

| Symbol | X          | Y          | Z          |
|--------|------------|------------|------------|
| C      | 5.6404410  | 0.8741850  | -1.5693230 |
| C      | 4.4822600  | 0.1953980  | -1.9484860 |
| C      | 3.3965580  | 0.9945760  | -2.2621590 |
| C      | 3.3810340  | 2.3722750  | -2.2319440 |
| C      | 4.5534370  | 3.0147660  | -1.8468150 |
| C      | 5.6777180  | 2.2639700  | -1.5189150 |
| H      | 6.5181160  | 0.2956330  | -1.3043140 |
| H      | 2.4874530  | 2.9205750  | -2.5033890 |
| H      | 4.5826120  | 4.0957740  | -1.8078720 |
| H      | 6.5903130  | 2.7644930  | -1.2205510 |
| C      | 1.2669430  | 0.2213970  | -1.8523000 |
| N      | 0.3843340  | 0.1464220  | -1.1305950 |
| C      | 4.3769570  | -1.3024700 | -1.9507950 |
| H      | 5.3811780  | -1.7344100 | -1.9970350 |
| H      | 3.8569330  | -1.6409440 | -2.8534990 |
| C      | 3.6627370  | -1.8736080 | -0.7384150 |
| C      | 3.3025820  | -1.1386720 | 0.3121820  |
| H      | 3.4926840  | -0.0730260 | 0.3713830  |
| H      | 2.8102720  | -1.5967330 | 1.1639860  |
| C      | 3.4043480  | -3.3529530 | -0.8180340 |
| H      | 4.2956850  | -3.8819270 | -1.1662770 |
| H      | 3.1191640  | -3.7605450 | 0.1515080  |
| H      | 2.6020230  | -3.5637660 | -1.5327000 |
| O      | 2.1931830  | 0.3114000  | -2.6969270 |
| B      | -0.7268200 | 0.0099920  | -0.0066440 |
| C      | -0.2128380 | -1.2309280 | 0.9108760  |
| C      | 0.0858250  | -2.4448190 | 0.3023800  |
| C      | -0.0236250 | -1.1929950 | 2.2835360  |
| C      | 0.5296950  | -3.5569090 | 0.9901540  |
| C      | 0.4413960  | -2.2821600 | 3.0097830  |
| C      | 0.7230160  | -3.4687770 | 2.3598510  |
| C      | -0.7458310 | 1.4428170  | 0.7661340  |
| C      | -1.9085850 | 2.0743590  | 1.1846850  |
| C      | 0.4331630  | 2.1039400  | 1.0871670  |
| C      | -1.9101940 | 3.2909020  | 1.8508540  |
| C      | 0.4757560  | 3.3183060  | 1.7474020  |

|   |            |            |            |
|---|------------|------------|------------|
| C | -0.7110960 | 3.9199460  | 2.1287380  |
| C | -2.1081240 | -0.2821080 | -0.8151110 |
| C | -3.0136660 | -1.2867450 | -0.5091850 |
| C | -2.4726570 | 0.5467980  | -1.8683850 |
| C | -4.1995450 | -1.4686710 | -1.2046020 |
| C | -3.6451450 | 0.3993110  | -2.5873800 |
| C | -4.5166430 | -0.6223020 | -2.2508230 |
| F | -3.1096060 | 1.5172750  | 0.9812280  |
| F | -3.0557850 | 3.8558750  | 2.2266170  |
| F | -0.6967140 | 5.0874610  | 2.7622810  |
| F | 1.6381270  | 3.9058610  | 2.0252910  |
| F | 1.6192090  | 1.5478570  | 0.7821730  |
| F | -1.6759650 | 1.5711240  | -2.2141540 |
| F | -3.9453540 | 1.2283950  | -3.5855940 |
| F | -5.6504290 | -0.7842460 | -2.9243890 |
| F | -5.0385520 | -2.4475200 | -0.8700810 |
| F | -2.7945020 | -2.1329750 | 0.5056300  |
| F | -0.0711420 | -2.5754230 | -1.0242030 |
| F | 0.7876430  | -4.7011340 | 0.3577540  |
| F | -0.2909010 | -0.0905330 | 2.9946980  |
| F | 0.6104650  | -2.1928110 | 4.3272330  |
| F | 1.1697710  | -4.5185630 | 3.0394210  |

TS<sub>18/19</sub>

M06 free energy in solution: -2763.524541 a.u.

| Symbol | X         | Y          | Z          |
|--------|-----------|------------|------------|
| C      | 6.0445910 | 1.2798240  | -1.3786070 |
| C      | 4.7050590 | 1.1535650  | -1.0185190 |
| C      | 4.2001590 | -0.1375960 | -0.8875990 |
| C      | 4.9690570 | -1.2705710 | -1.0867670 |
| C      | 6.3071370 | -1.1162520 | -1.4286380 |
| C      | 6.8434170 | 0.1587630  | -1.5754810 |
| H      | 6.4627760 | 2.2726110  | -1.4998350 |
| H      | 4.5123850 | -2.2447250 | -0.9647350 |
| H      | 6.9242780 | -1.9918320 | -1.5845290 |
| H      | 7.8843590 | 0.2819420  | -1.8461090 |
| C      | 1.7913040 | 0.2035540  | -0.9324600 |
| N      | 0.6347010 | 0.2064070  | -0.7254300 |
| C      | 3.8053620 | 2.3344380  | -0.8003530 |
| H      | 4.3200360 | 3.2716850  | -1.0351260 |
| H      | 3.5190340 | 2.4068870  | 0.2568440  |



|   |            |            |            |
|---|------------|------------|------------|
| C | 2.5350310  | 2.2742580  | -1.5984840 |
| C | 2.3180300  | 1.3065230  | -2.5407320 |
| H | 3.1275090  | 0.6986190  | -2.9306380 |
| H | 1.3832080  | 1.3035250  | -3.0880120 |
| C | 1.4578140  | 3.2525580  | -1.2760890 |
| H | 1.4412960  | 4.0265820  | -2.0493950 |
| H | 0.4849070  | 2.7498930  | -1.2991870 |
| H | 1.6104040  | 3.7274430  | -0.3071840 |
| O | 2.8865460  | -0.3644950 | -0.4645680 |
| B | -0.6661140 | -0.1437740 | 0.0539590  |
| C | -1.1447010 | 1.2607500  | 0.7444100  |
| C | -0.2216490 | 2.1185670  | 1.3286260  |
| C | -2.4611230 | 1.6963410  | 0.8000540  |
| C | -0.5522100 | 3.3421250  | 1.8832890  |
| C | -2.8384730 | 2.9080820  | 1.3597370  |
| C | -1.8761980 | 3.7428080  | 1.8976350  |
| C | -1.7175540 | -0.6647950 | -1.0811280 |
| C | -2.4454080 | -1.8434560 | -1.0309320 |
| C | -1.9222020 | 0.1069870  | -2.2180530 |
| C | -3.3089580 | -2.2426560 | -2.0413960 |
| C | -2.7730170 | -0.2529340 | -3.2472410 |
| C | -3.4728090 | -1.4440700 | -3.1570930 |
| C | -0.2602740 | -1.2800240 | 1.1573270  |
| C | -0.5690080 | -1.2405200 | 2.5081660  |
| C | 0.4864960  | -2.3810850 | 0.7547780  |
| C | -0.1508290 | -2.2114930 | 3.4083320  |
| C | 0.9251730  | -3.3679640 | 1.6169230  |
| C | 0.6047700  | -3.2782210 | 2.9615740  |
| F | -2.3584080 | -2.6689030 | 0.0215620  |
| F | -3.9813890 | -3.3893540 | -1.9448350 |
| F | -4.2973190 | -1.8131190 | -4.1331950 |
| F | -2.9293790 | 0.5301030  | -4.3146480 |
| F | -1.2917430 | 1.2880180  | -2.3528540 |
| F | 0.7969200  | -2.5353280 | -0.5433730 |
| F | 1.6436500  | -4.3994250 | 1.1726180  |
| F | 1.0150490  | -4.2147420 | 3.8122470  |
| F | -0.4701270 | -2.1218680 | 4.6996120  |
| F | -1.3130950 | -0.2503330 | 3.0225260  |
| F | 1.0830590  | 1.7864690  | 1.3832150  |
| F | 0.3922450  | 4.1350350  | 2.3916850  |
| F | -3.4569170 | 0.9382200  | 0.3206850  |

|   |            |           |           |
|---|------------|-----------|-----------|
| F | -4.1189020 | 3.2748750 | 1.3845450 |
| F | -2.2190630 | 4.9117200 | 2.4296540 |

---

19

M06 free energy in solution: -2763.529535 a.u.

| Symbol | X          | Y          | Z          |
|--------|------------|------------|------------|
| C      | 5.5721970  | 1.1645690  | -1.9020500 |
| C      | 4.2086500  | 1.0998410  | -1.6217590 |
| C      | 3.6863340  | -0.1167680 | -1.1782090 |
| C      | 4.4867100  | -1.2382690 | -1.0096080 |
| C      | 5.8454590  | -1.1460120 | -1.2784390 |
| C      | 6.3891760  | 0.0547010  | -1.7275140 |
| H      | 5.9929990  | 2.0997240  | -2.2544490 |
| H      | 4.0285180  | -2.1584300 | -0.6663630 |
| H      | 6.4780060  | -2.0142660 | -1.1431100 |
| H      | 7.4477150  | 0.1259000  | -1.9423490 |
| C      | 1.3178620  | 0.1900310  | -1.5969340 |
| N      | 0.1328200  | 0.2309380  | -1.2941690 |
| C      | 3.3114900  | 2.2955940  | -1.7689310 |
| H      | 3.8099650  | 3.1096450  | -2.3156390 |
| H      | 3.0589920  | 2.7370760  | -0.7947280 |
| C      | 2.0370720  | 2.0578750  | -2.4816010 |
| C      | 1.7648010  | 0.7690830  | -3.0349960 |
| H      | 2.6331510  | 0.2064200  | -3.3749430 |
| H      | 0.8964370  | 0.7087240  | -3.6793260 |
| C      | 0.9900810  | 3.0866260  | -2.4882710 |
| H      | 0.8259840  | 3.4032200  | -3.5252030 |
| H      | 0.0514460  | 2.6062610  | -2.1711500 |
| H      | 1.2254830  | 3.9426010  | -1.8594800 |
| O      | 2.3607340  | -0.2403070 | -0.8206290 |
| B      | -0.6703810 | -0.1485830 | -0.0177150 |
| C      | -1.0970390 | 1.3148650  | 0.6125140  |
| C      | -0.1656600 | 2.3394770  | 0.7098690  |
| C      | -2.3680320 | 1.6542250  | 1.0557550  |
| C      | -0.4553770 | 3.6169270  | 1.1561030  |
| C      | -2.7028070 | 2.9163020  | 1.5232250  |
| C      | -1.7423210 | 3.9102590  | 1.5669300  |
| C      | -1.9816760 | -0.9550410 | -0.5950410 |
| C      | -2.3898270 | -2.2335630 | -0.2468770 |
| C      | -2.7708400 | -0.3372720 | -1.5614850 |
| C      | -3.4852580 | -2.8682500 | -0.8192510 |

|   |            |            |            |   |            |            |            |
|---|------------|------------|------------|---|------------|------------|------------|
| C | -3.8704540 | -0.9310820 | -2.1527040 | H | 4.6033510  | 2.8967960  | -1.6064360 |
| C | -4.2301710 | -2.2148730 | -1.7797420 | C | 2.6461010  | 2.2541630  | -2.1597330 |
| C | 0.2217630  | -1.0231630 | 1.0462460  | C | 1.7846860  | 1.2561500  | -2.8637060 |
| C | 0.4226970  | -0.7227770 | 2.3831550  | H | 2.3591350  | 0.5913520  | -3.5095850 |
| C | 0.9118120  | -2.1412230 | 0.5929400  | H | 0.9512250  | 1.7119210  | -3.3939700 |
| C | 1.2691170  | -1.4530060 | 3.2103810  | C | 2.0133800  | 3.4591590  | -1.6104910 |
| C | 1.7721760  | -2.8862020 | 1.3717640  | H | 2.2231480  | 4.2389140  | -2.3609950 |
| C | 1.9551170  | -2.5358950 | 2.7005480  | H | 0.9336380  | 3.3625160  | -1.5107060 |
| F | -1.7434390 | -2.9483290 | 0.6869820  | H | 2.4806900  | 3.7752810  | -0.6784740 |
| F | -3.8227090 | -4.1041370 | -0.4460120 | O | 2.5048160  | 0.6899880  | -0.7273630 |
| F | -5.2857020 | -2.8058710 | -2.3355410 | B | -0.7034110 | -0.0951520 | -0.0149510 |
| F | -4.5950480 | -0.2802410 | -3.0653450 | C | -1.3671240 | 1.3672040  | 0.3621610  |
| F | -2.5134880 | 0.9254180  | -1.9396050 | C | -0.5140650 | 2.4250350  | 0.6543490  |
| F | 0.7620690  | -2.5352720 | -0.6823690 | C | -2.7142850 | 1.6949680  | 0.3835320  |
| F | 2.4418580  | -3.9237510 | 0.8604320  | C | -0.9308570 | 3.7176120  | 0.9056750  |
| F | 2.7816300  | -3.2377340 | 3.4728290  | C | -3.1811530 | 2.9785460  | 0.6425520  |
| F | 1.4273090  | -1.1106460 | 4.4908700  | C | -2.2867060 | 3.9990680  | 0.8979090  |
| F | -0.1997320 | 0.3117670  | 2.9712880  | C | -1.8233860 | -1.1737250 | -0.5509200 |
| F | 1.1265850  | 2.1229610  | 0.3779980  | C | -2.1430460 | -2.3893450 | 0.0355760  |
| F | 0.4913680  | 4.5570310  | 1.1919980  | C | -2.5233880 | -0.8958290 | -1.7222400 |
| F | -3.3589340 | 0.7510720  | 1.0680400  | C | -3.0618500 | -3.2816030 | -0.5034510 |
| F | -3.9433310 | 3.1815460  | 1.9324780  | C | -3.4438800 | -1.7550620 | -2.2926130 |
| F | -2.0496250 | 5.1273030  | 2.0074480  | C | -3.7126820 | -2.9666120 | -1.6784830 |

TS<sub>19/20</sub>

M06 free energy in solution: -2763.509632 a.u.

| Symbol | X          | Y          | Z          |
|--------|------------|------------|------------|
| C      | 5.7315650  | 0.1623870  | -2.3430070 |
| C      | 4.5429720  | 0.7464530  | -1.9227920 |
| C      | 3.6569510  | 0.0248370  | -1.1237740 |
| C      | 3.9431680  | -1.2770640 | -0.7380650 |
| C      | 5.1377110  | -1.8510530 | -1.1589230 |
| C      | 6.0307500  | -1.1378140 | -1.9540120 |
| H      | 6.4167230  | 0.7232250  | -2.9678660 |
| H      | 3.2464330  | -1.8372790 | -0.1349550 |
| H      | 5.3669890  | -2.8677200 | -0.8645570 |
| H      | 6.9579460  | -1.5962070 | -2.2738960 |
| C      | 1.2840770  | 0.5511720  | -1.6075930 |
| N      | 0.1762650  | 0.2391310  | -1.2504400 |
| C      | 4.1177970  | 2.1550670  | -2.2429610 |
| H      | 4.3622070  | 2.3892980  | -3.2903940 |
| C      | 0.1930540  | -0.6977450 | 1.2206800  |
| C      | 0.2428870  | -0.2318630 | 2.5248760  |
| C      | 0.9975800  | -1.8006940 | 0.9746910  |
| C      | 1.0512370  | -0.7926340 | 3.5061900  |
| C      | 1.8149490  | -2.3932360 | 1.9172150  |
| C      | 1.8495760  | -1.8769310 | 3.2012550  |
| F      | -1.5809070 | -2.7845520 | 1.1892470  |
| F      | -3.3192250 | -4.4402780 | 0.1064880  |
| F      | -4.5954880 | -3.8087100 | -2.2105510 |
| F      | -4.0846820 | -1.4255880 | -3.4162000 |
| F      | -2.3676430 | 0.2860450  | -2.3360380 |
| F      | 0.9900410  | -2.3666160 | -0.2466530 |
| F      | 2.5814310  | -3.4398300 | 1.5961070  |
| F      | 2.6350290  | -2.4221660 | 4.1261390  |
| F      | 1.0630810  | -0.2884840 | 4.7411020  |
| F      | -0.5089660 | 0.8034270  | 2.9300050  |
| F      | 0.8116280  | 2.2076600  | 0.7262120  |
| F      | -0.0463050 | 4.6856220  | 1.1559780  |

|   |            |           |           |
|---|------------|-----------|-----------|
| F | -3.6656540 | 0.7778760 | 0.1595990 |
| F | -4.4898670 | 3.2342860 | 0.6416530 |
| F | -2.7194630 | 5.2335490 | 1.1386000 |

---

20

M06 free energy in solution: -2763.599045 a.u.

| Symbol | X          | Y          | Z          |
|--------|------------|------------|------------|
| C      | -6.2445320 | 0.3304740  | -2.3115790 |
| C      | -5.0897980 | -0.3486750 | -1.9597320 |
| C      | -4.3670950 | 0.0552790  | -0.8416650 |
| C      | -4.7461620 | 1.1219240  | -0.0474760 |
| C      | -5.9129780 | 1.7953490  | -0.4106960 |
| C      | -6.6528350 | 1.4115320  | -1.5269580 |
| H      | -6.8218010 | 0.0291760  | -3.1781420 |
| H      | -4.1566850 | 1.4102070  | 0.8123010  |
| H      | -6.2419020 | 2.6378250  | 0.1858180  |
| H      | -7.5511160 | 1.9564810  | -1.7890340 |
| C      | -0.8946370 | -0.3171860 | -1.9153840 |
| N      | -0.0351900 | -0.0939470 | -1.1992600 |
| C      | -4.4020820 | -1.5614610 | -2.5364360 |
| H      | -4.2991050 | -1.5402410 | -3.6225230 |
| H      | -4.9281880 | -2.4797520 | -2.2611050 |
| C      | -3.0340450 | -1.4960460 | -1.8240560 |
| C      | -2.0597430 | -0.6651280 | -2.7068570 |
| H      | -2.5385920 | 0.2643460  | -3.0291530 |
| H      | -1.7426280 | -1.2252100 | -3.5887610 |
| C      | -2.4420400 | -2.8265690 | -1.4129200 |
| H      | -2.2175730 | -3.4334930 | -2.2919510 |
| H      | -1.5226750 | -2.6807640 | -0.8398770 |
| H      | -3.1579270 | -3.3597240 | -0.7869880 |
| O      | -3.2576460 | -0.7208880 | -0.6274800 |
| B      | 0.9755900  | 0.0829700  | 0.0291100  |
| C      | 2.3120640  | -0.7412580 | -0.3934980 |
| C      | 2.1977340  | -2.0425850 | -0.8677700 |
| C      | 3.6078990  | -0.2514520 | -0.3231900 |
| C      | 3.2725550  | -2.8152170 | -1.2621960 |
| C      | 4.7158140  | -0.9926150 | -0.7119800 |
| C      | 4.5475840  | -2.2788740 | -1.1871530 |
| C      | 1.2076880  | 1.6834290  | 0.1562650  |
| C      | 1.0726480  | 2.4215700  | 1.3210890  |
| C      | 1.5940340  | 2.4038740  | -0.9662280 |

|   |            |            |            |
|---|------------|------------|------------|
| C | 1.2990610  | 3.7893830  | 1.3736010  |
| C | 1.8292630  | 3.7658230  | -0.9574220 |
| C | 1.6770460  | 4.4649320  | 0.2282670  |
| C | 0.1040550  | -0.5921710 | 1.2324680  |
| C | 0.4686030  | -1.7013850 | 1.9820320  |
| C | -1.1768620 | -0.1084090 | 1.4781910  |
| C | -0.3870850 | -2.3124800 | 2.8884030  |
| C | -2.0638840 | -0.6974900 | 2.3568510  |
| C | -1.6635770 | -1.8147230 | 3.0702590  |
| F | 0.7208760  | 1.8378210  | 2.4732070  |
| F | 1.1536290  | 4.4573540  | 2.5167780  |
| F | 1.8967690  | 5.7747980  | 0.2651000  |
| F | 2.2032620  | 4.4060190  | -2.0637670 |
| F | 1.7853160  | 1.7589010  | -2.1282470 |
| F | -1.6017350 | 0.9911580  | 0.8391980  |
| F | -3.2898050 | -0.2051460 | 2.5253900  |
| F | -2.4957030 | -2.3975520 | 3.9261510  |
| F | 0.0123980  | -3.3788710 | 3.5797290  |
| F | 1.6833530  | -2.2526230 | 1.8674080  |
| F | 0.9857790  | -2.6218170 | -0.9224870 |
| F | 3.0995170  | -4.0600990 | -1.7023540 |
| F | 3.8648220  | 0.9773850  | 0.1417670  |
| F | 5.9385070  | -0.4715340 | -0.6304440 |
| F | 5.5980800  | -2.9989100 | -1.5637490 |

---
